# Supplementary material for: Molecular features and clinical implications of the heterogeneity in Chinese patients with HER2-low breast cancer
Source: PubMed Central journal article supplement (PMC10444861; doi:10.1038/s41467-023-40715-x), 2023-08-22
Supplement: 41467_2023_40715_MOESM1_ESM.pdf [file 41467_2023_40715_MOESM1_ESM.pdf]

Supplementary Information for

**Molecular features and clinical implications of the heterogeneity in  
Chinese patients with HER2-low breast cancer**

Lei-Jie Dai, Ding Ma, Yu-Zheng Xu, Ming Li, et al.

This file includes:

Supplementary Figures 1-11

Supplementary Table 1-2

Supplementary Methods

**a****Multomics HER2-low Cohort (434 patients)**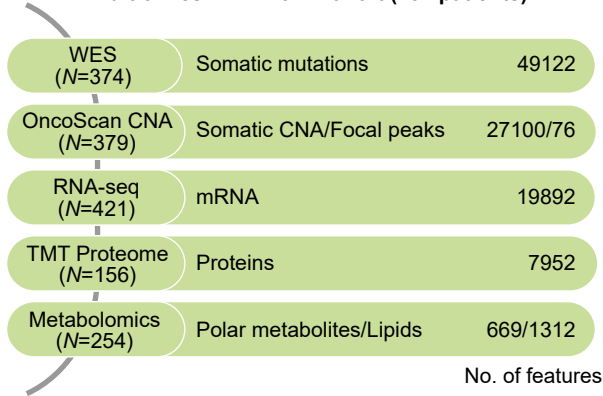**b**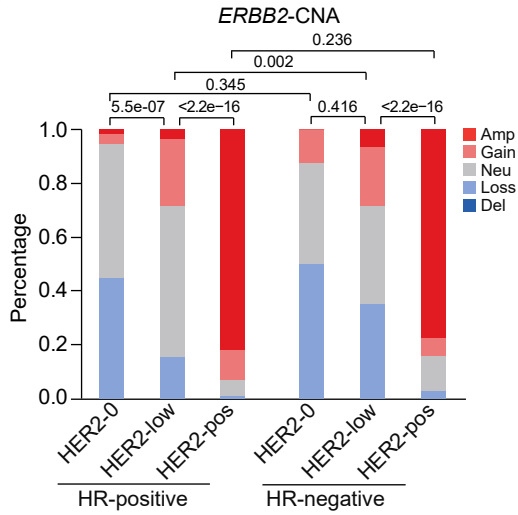**c**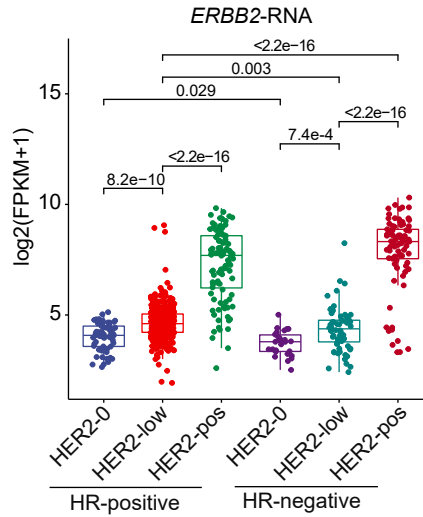**d**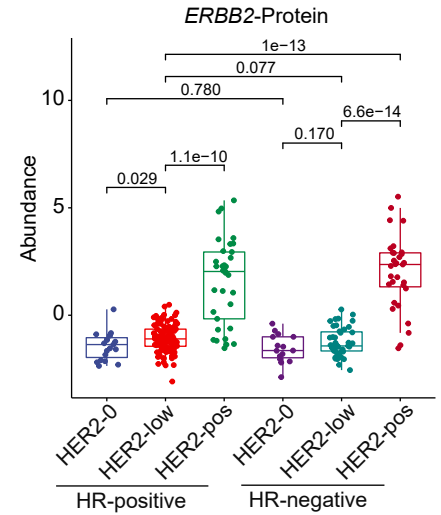

**Figure S1. The omics overview of the Fudan University Shanghai Cancer Center (FUSCC) HER2-low cohort, related to Figure 1.**

- (a) Multiomics level and number of features of included HER2-low patients. WES, whole exome sequencing; TMT: tandem mass tag.
- (b) Bar plots comparing the copy number alteration (CNA) of *ERBB2* among HER2 status subgroups stratified by hormone receptor (HR) status based on Genomic Identification of Significant Targets in Cancer (GISTIC) analysis. Amp: 2, gain: 1, neu: 0, loss: -1, del: -2. P values were computed using the two-sided Fisher's exact test.
- (c-d) Boxplots comparing the RNA (c) and protein (d) levels of *ERBB2* among HER2 status subgroups stratified by HR status. For RNA, the number (N) of HR-positive HER2-0, HR-positive HER2-low, HR-positive HER2-positive, HR-negative HER2-0, HR-negative HER2-low, and HR-negative HER2-positive is 61, 355, 100, 27, 66, and 81. For protein, the number (N) was 19, 113, 33, 15, 43 and 31. P values were computed using the two-sided Wilcoxon test. In boxplots, the centerline represents the median, the box limits represent the upper and lower quartiles, the whiskers represent the 1.5x interquartile range, and the points represent individual samples.

Source data are provided as a Source Data file.

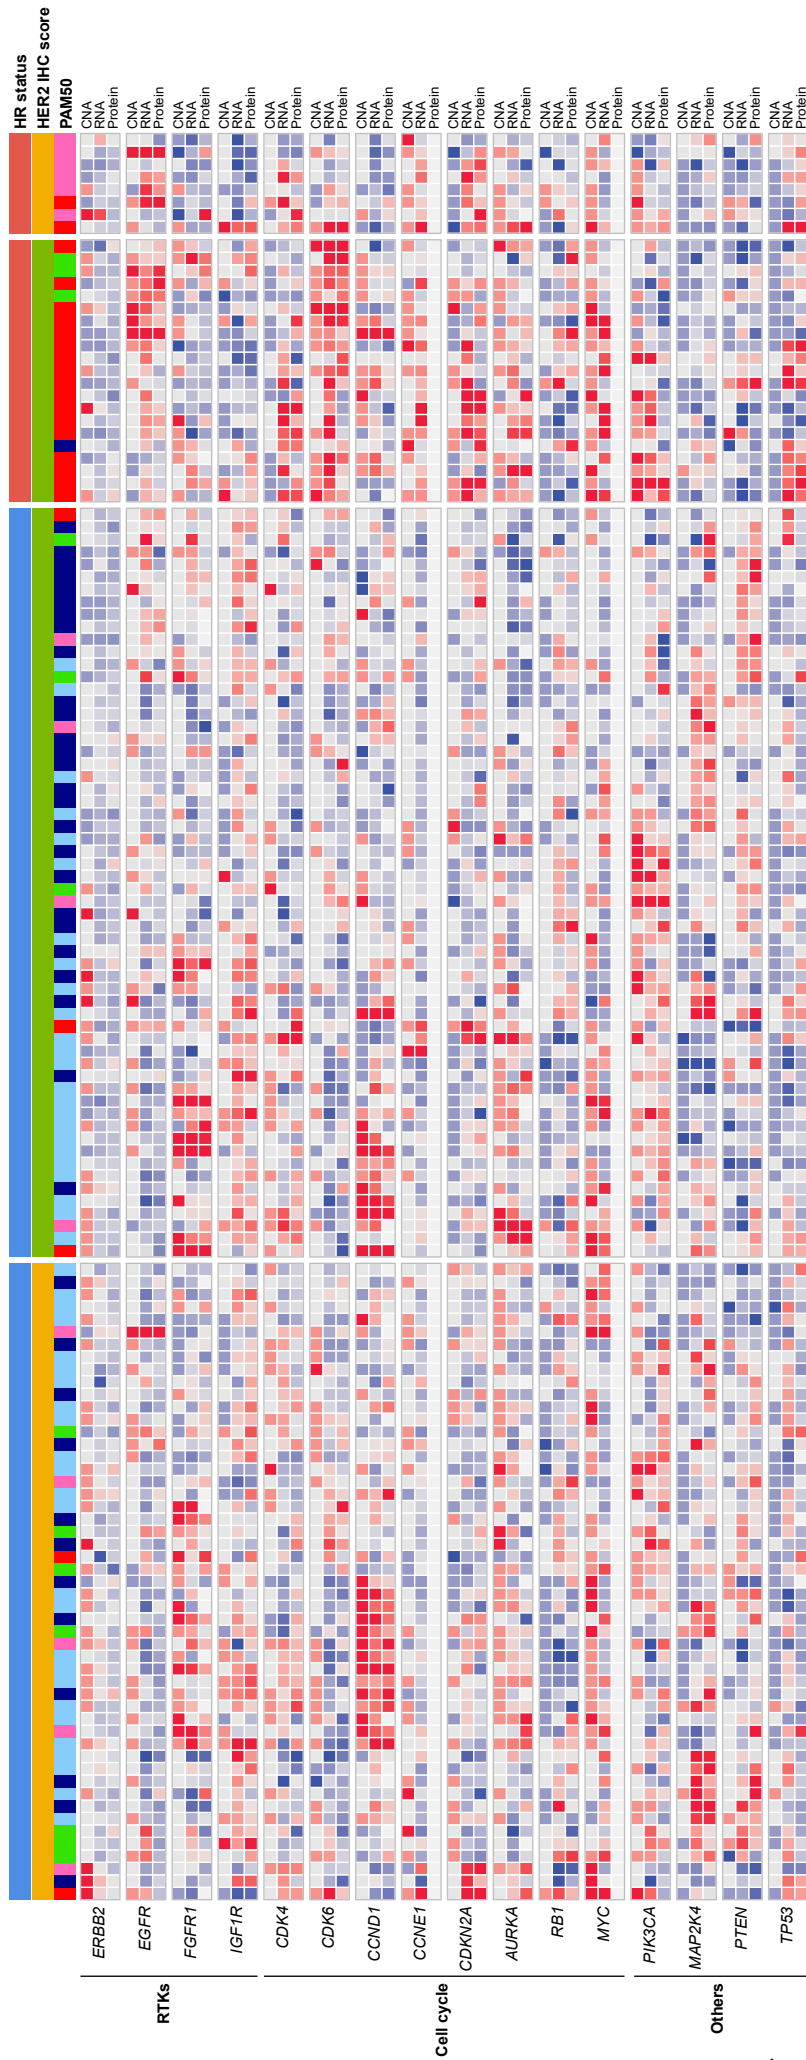

**Figure S2. CNA-RNA-protein integrated analyses of frequently altered breast cancer genes in HER2-low breast cancers, related to Figure 1e.**

Samples with all CNA, RNA and protein data were included. RTKs: receptor tyrosine kinases.

Source data are provided as a Source Data file.

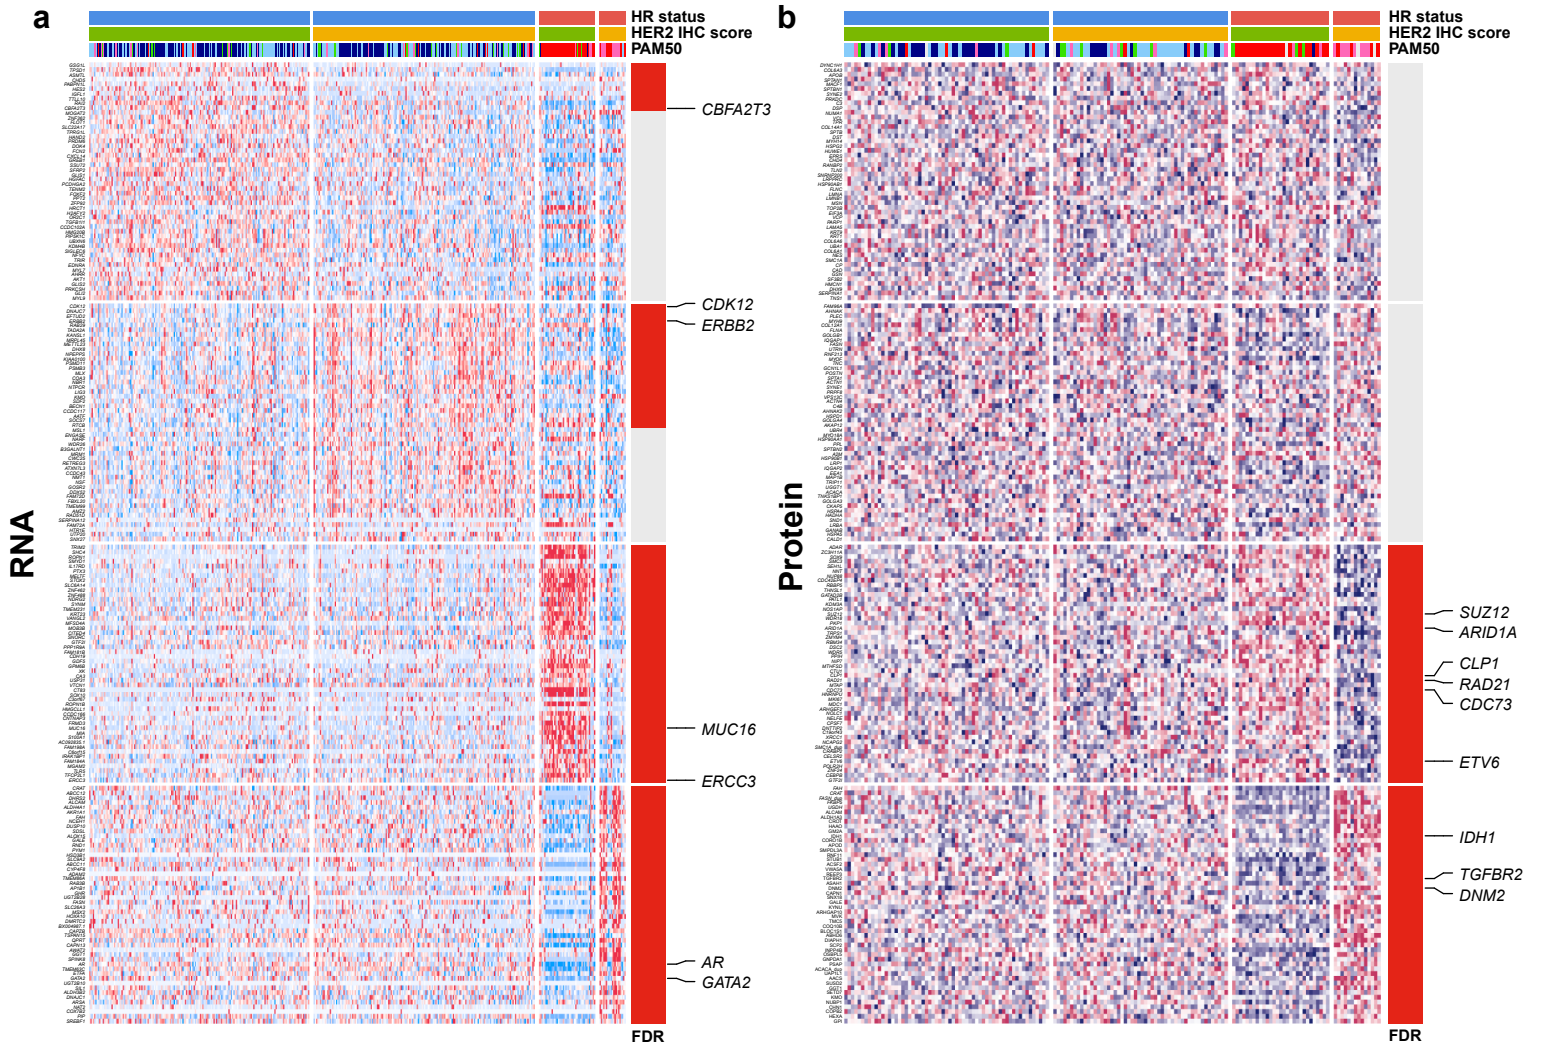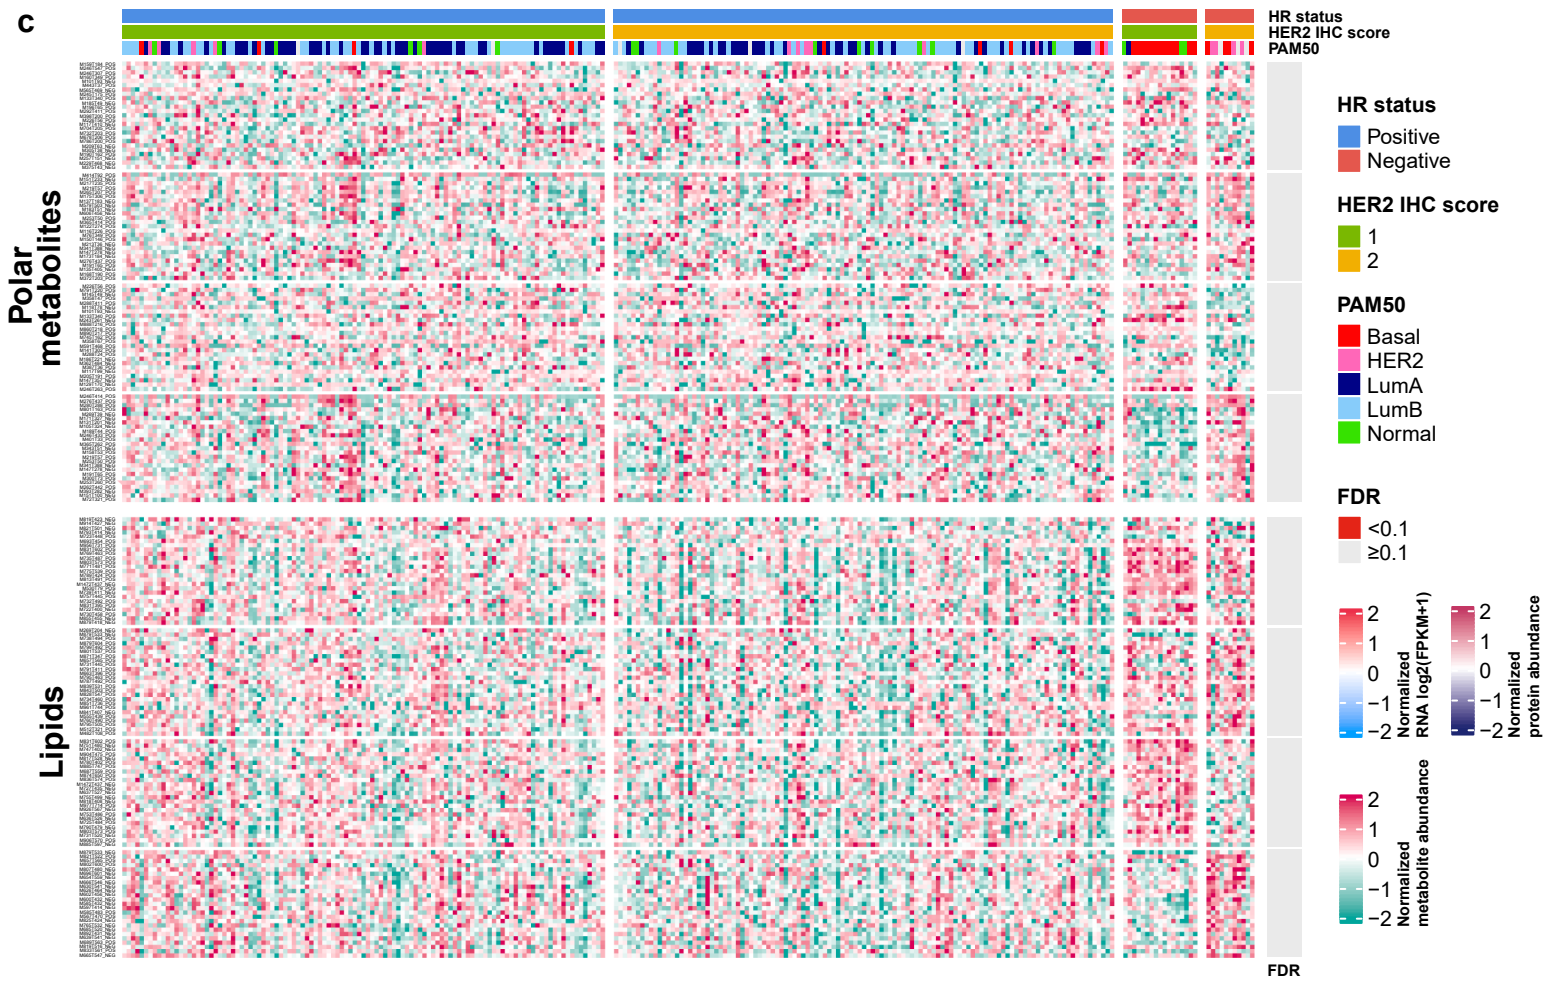

**Figure S3. Heatmap showing the molecular landscape of HER2-low breast cancers, related to Figure 1e.**

(a-c) Samples were stratified by hormone receptor (HR) status and HER2 IHC scores. RNA-seq (a), proteome (b) and metabolome (c) data are shown separately.

Source data are provided as a Source Data file.

**a****All patients**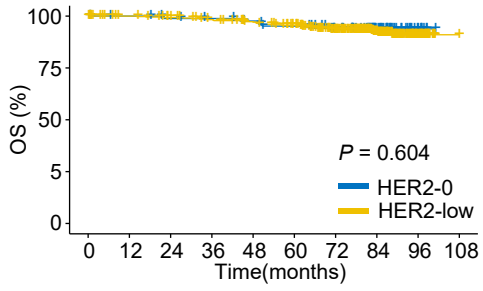

Number at risk

|   |     |     |     |     |     |     |     |     |    |     |
|---|-----|-----|-----|-----|-----|-----|-----|-----|----|-----|
| — | 91  | 88  | 85  | 83  | 80  | 76  | 65  | 37  | 10 | 0   |
| — | 433 | 419 | 410 | 399 | 386 | 369 | 321 | 192 | 57 | 1   |
|   | 0   | 12  | 24  | 36  | 48  | 60  | 72  | 84  | 96 | 108 |

**b****HR-positive**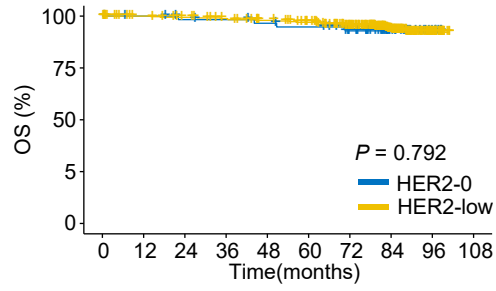

Number at risk

|   |     |     |     |     |     |     |     |     |    |     |
|---|-----|-----|-----|-----|-----|-----|-----|-----|----|-----|
| — | 63  | 61  | 58  | 57  | 55  | 53  | 45  | 21  | 5  | 0   |
| — | 361 | 348 | 341 | 333 | 322 | 310 | 274 | 162 | 45 | 0   |
|   | 0   | 12  | 24  | 36  | 48  | 60  | 72  | 84  | 96 | 108 |

**c****HR-negative**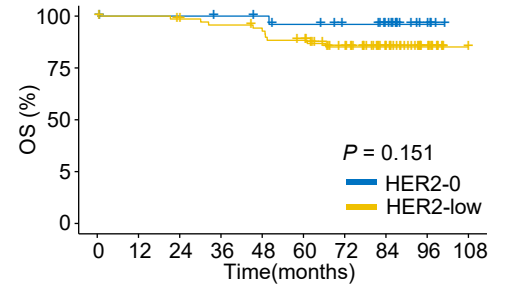

Number at risk

|   |    |    |    |    |    |    |    |    |    |     |
|---|----|----|----|----|----|----|----|----|----|-----|
| — | 28 | 27 | 27 | 26 | 25 | 23 | 20 | 16 | 5  | 0   |
| — | 72 | 71 | 69 | 66 | 64 | 59 | 47 | 30 | 12 | 1   |
|   | 0  | 12 | 24 | 36 | 48 | 60 | 72 | 84 | 96 | 108 |



**Figure S4. Difference in overall survival (OS) between HER2-low and HER2-0 patients, related to Figure 2.**

(a-c) Kaplan–Meier curves and risk tables showing OS of HER2-low and HER2-0 breast cancers compared by two-sided log-rank test in the entire cohort (a), HR-positive subgroup (b) and HR-negative subgroup (c).

Source data are provided as a Source Data file.

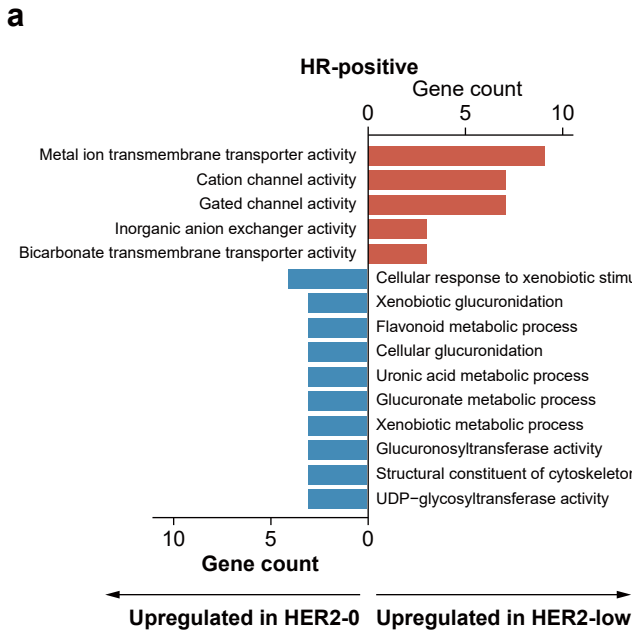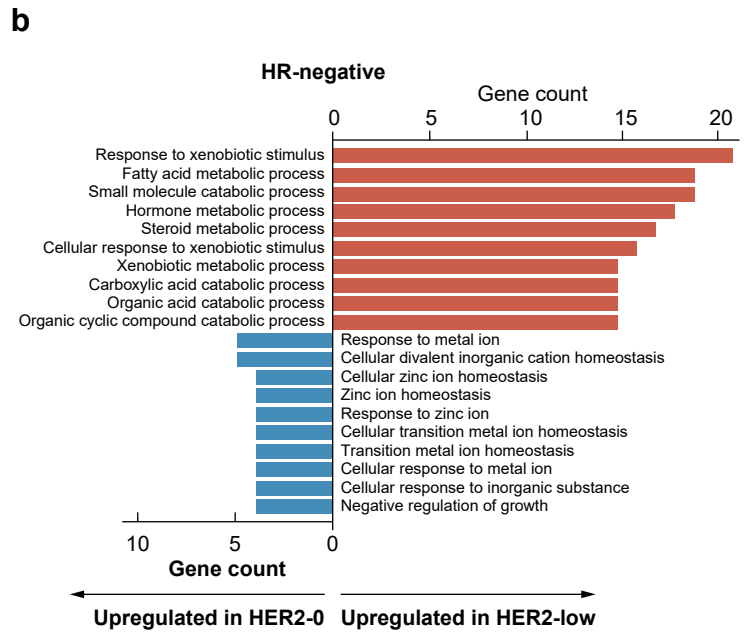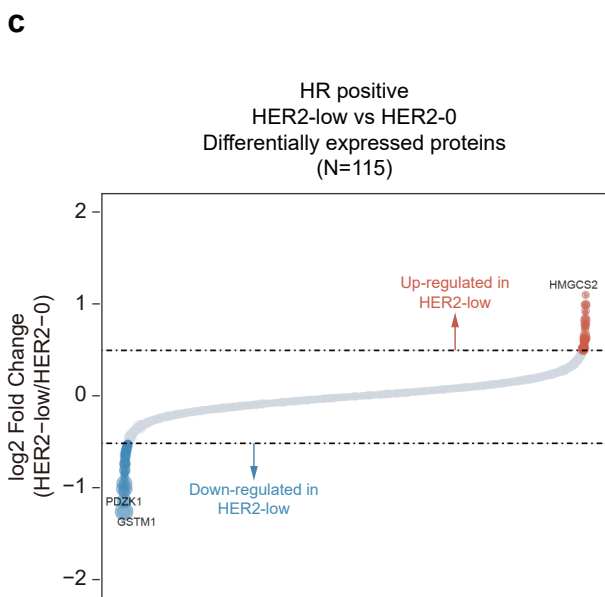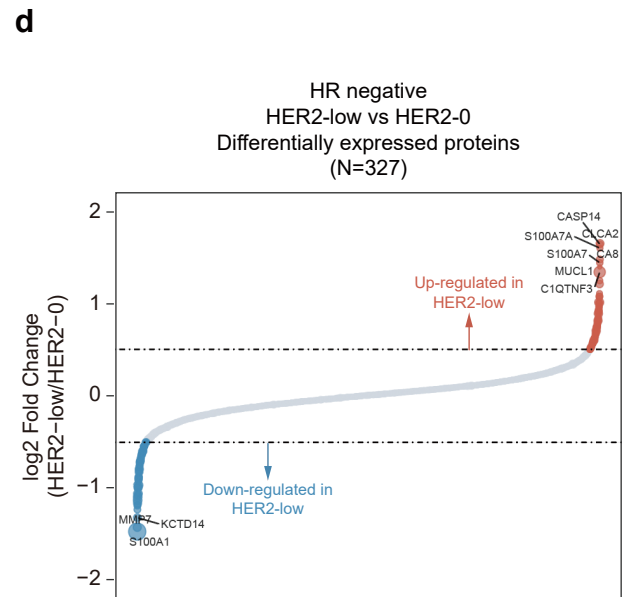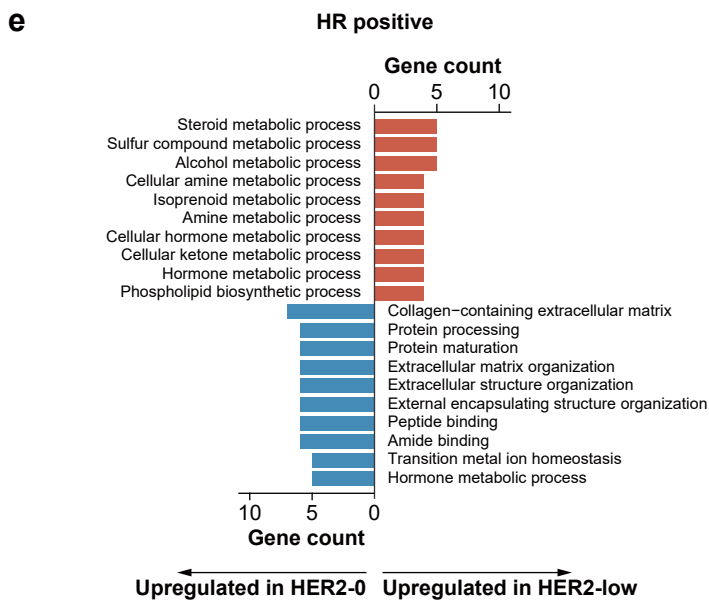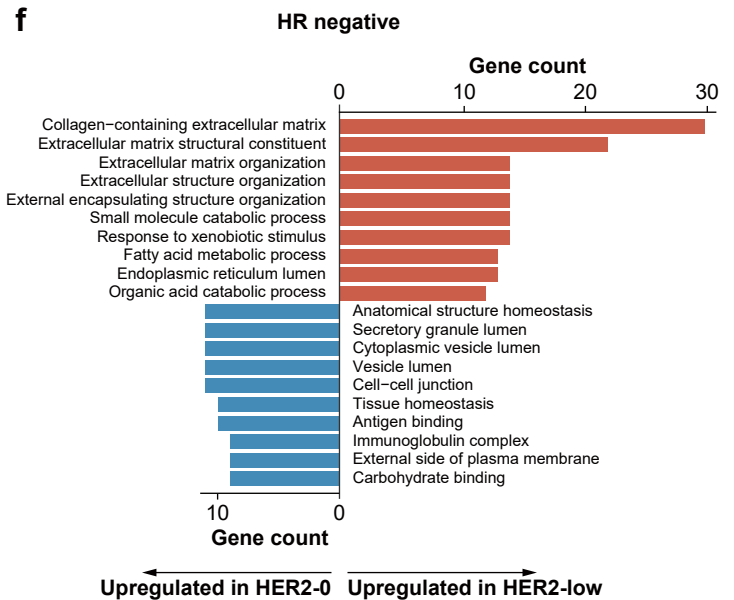

**Figure S5. Difference between HER2-low and HER2-0 breast cancer with different HR statuses, related to Figure 3.**

(a-b) Gene Ontology (GO) enrichment analysis of genes that were differentially expressed between HER2-low and HER2-0 breast cancers in the HR-positive (a) and HR-negative (b) subgroups.

(c-d) Dot plot showing differentially expressed proteins between HER2-low and HER2-0 breast cancers in the HR-positive (c) and HR-negative (d) subgroups.

(e-f) GO enrichment analysis of proteins that were differentially expressed between HER2-low and HER2-0 breast cancers in the HR-positive (e) and HR-negative (f) subgroups.

Source data are provided as a Source Data file.

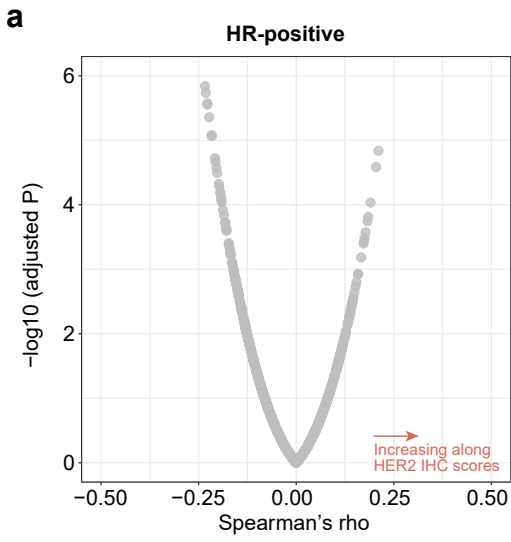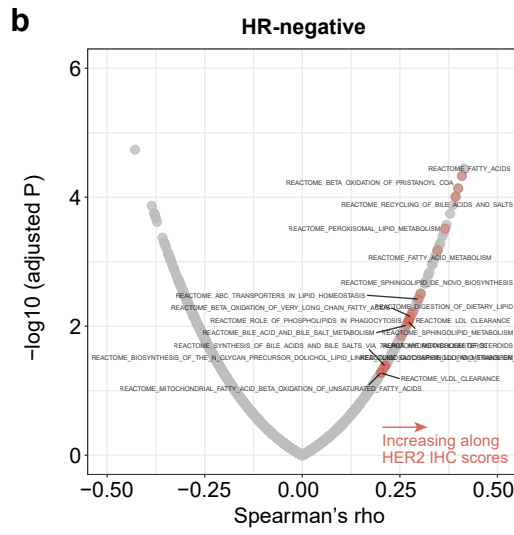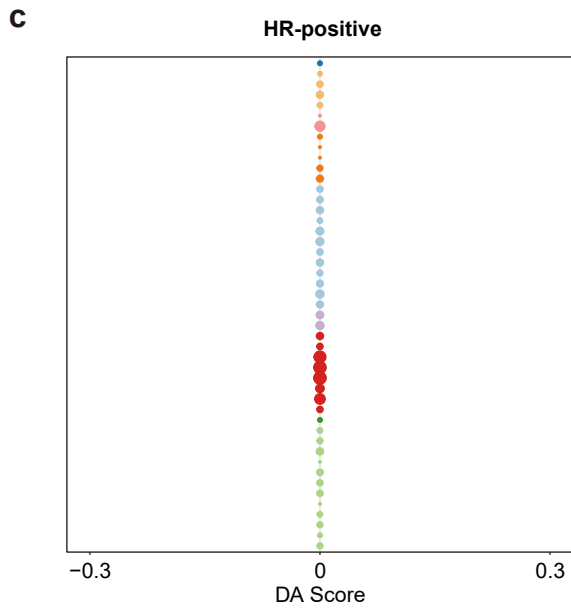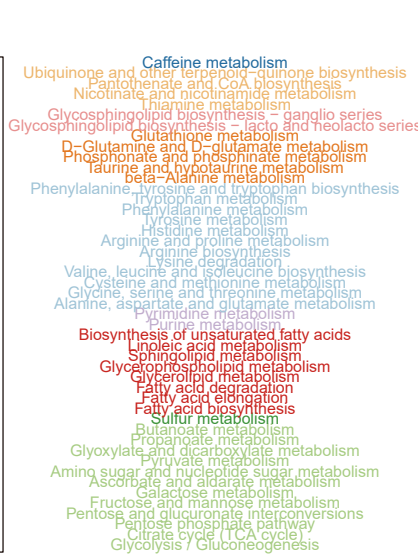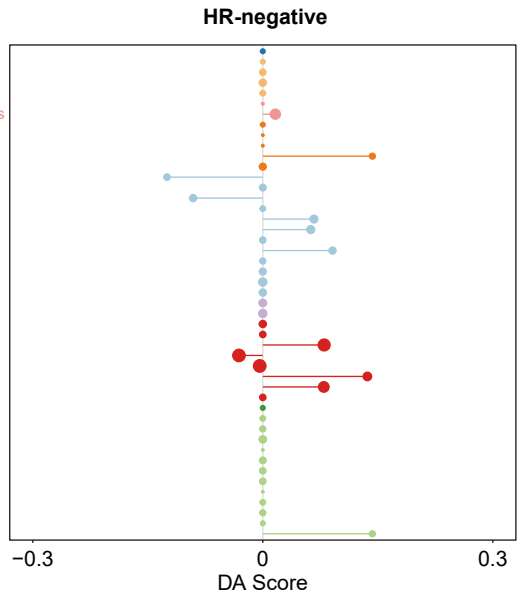

**Pathway category**

- Amino acid metabolism
- Biosynthesis of other secondary metabolites
- Carbohydrate metabolism
- Energy metabolism
- Glycan biosynthesis and metabolism
- Lipid metabolism
- Metabolism of cofactors and vitamins
- Metabolism of other amino acids
- Nucleotide metabolism

**Log<sub>2</sub>(Annotated metabolites)**

- 2
- 4
- 6
- 8

**Figure S6. The trend of pathway activity and result of metabolite enrichment, related to Figure 3.**

- (a-b) Dot plots showing the trend of REACTOME pathway activity changing with HER2 IHC scores in HR-positive (a) and HR-negative (b) subgroups. Significantly increasing or decreasing lipid-related gene sets were plotted in red dots and annotated. P values were computed by Spearman's rank correlation analysis and were adjusted for multiple testing using false discovery rate method.
- (c) Pathway-based analysis of lipid and polar metabolite changes along with HER2 IHC scores in different HR subgroups.

Source data are provided as a Source Data file.

**a**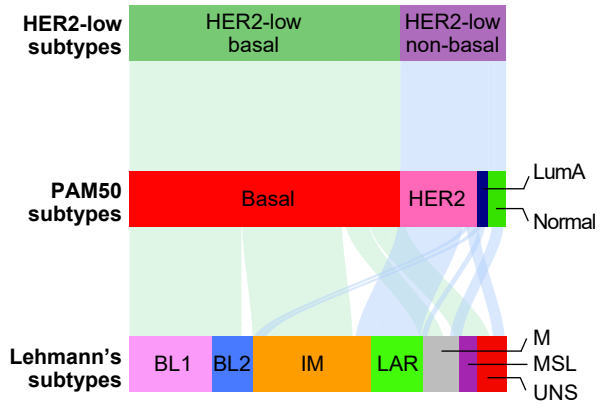**b**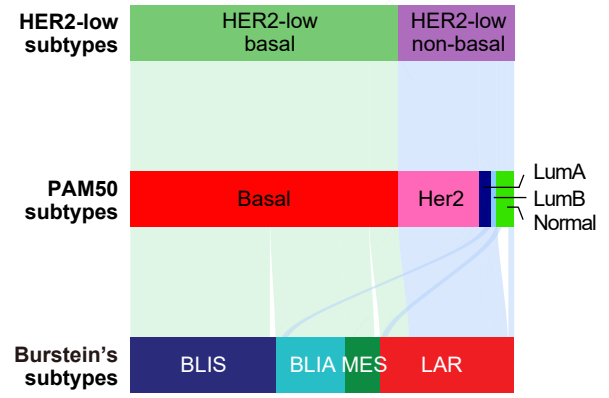**c**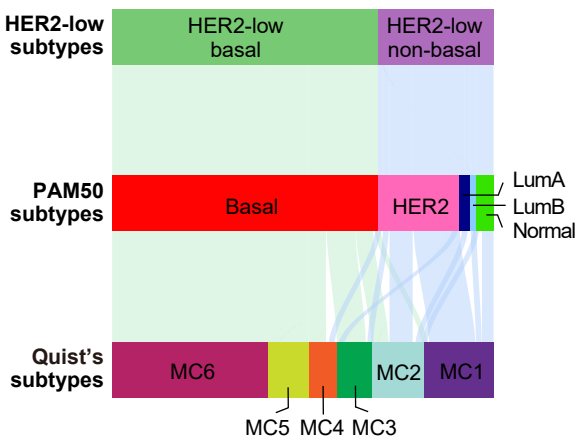

**Figure S7. Sankey diagram showing the classification of HR-negative HER2-low non-basal-like tumors in the PAM50 subtype and other molecular subtypes, related to Figure 4.**

(a) Lehmann's TNBC subtyping<sup>1</sup>. (b) Burstein's TNBC subtyping<sup>2</sup>. (c) Quist's TNBC subtyping<sup>3</sup>

Source data are provided as a Source Data file.

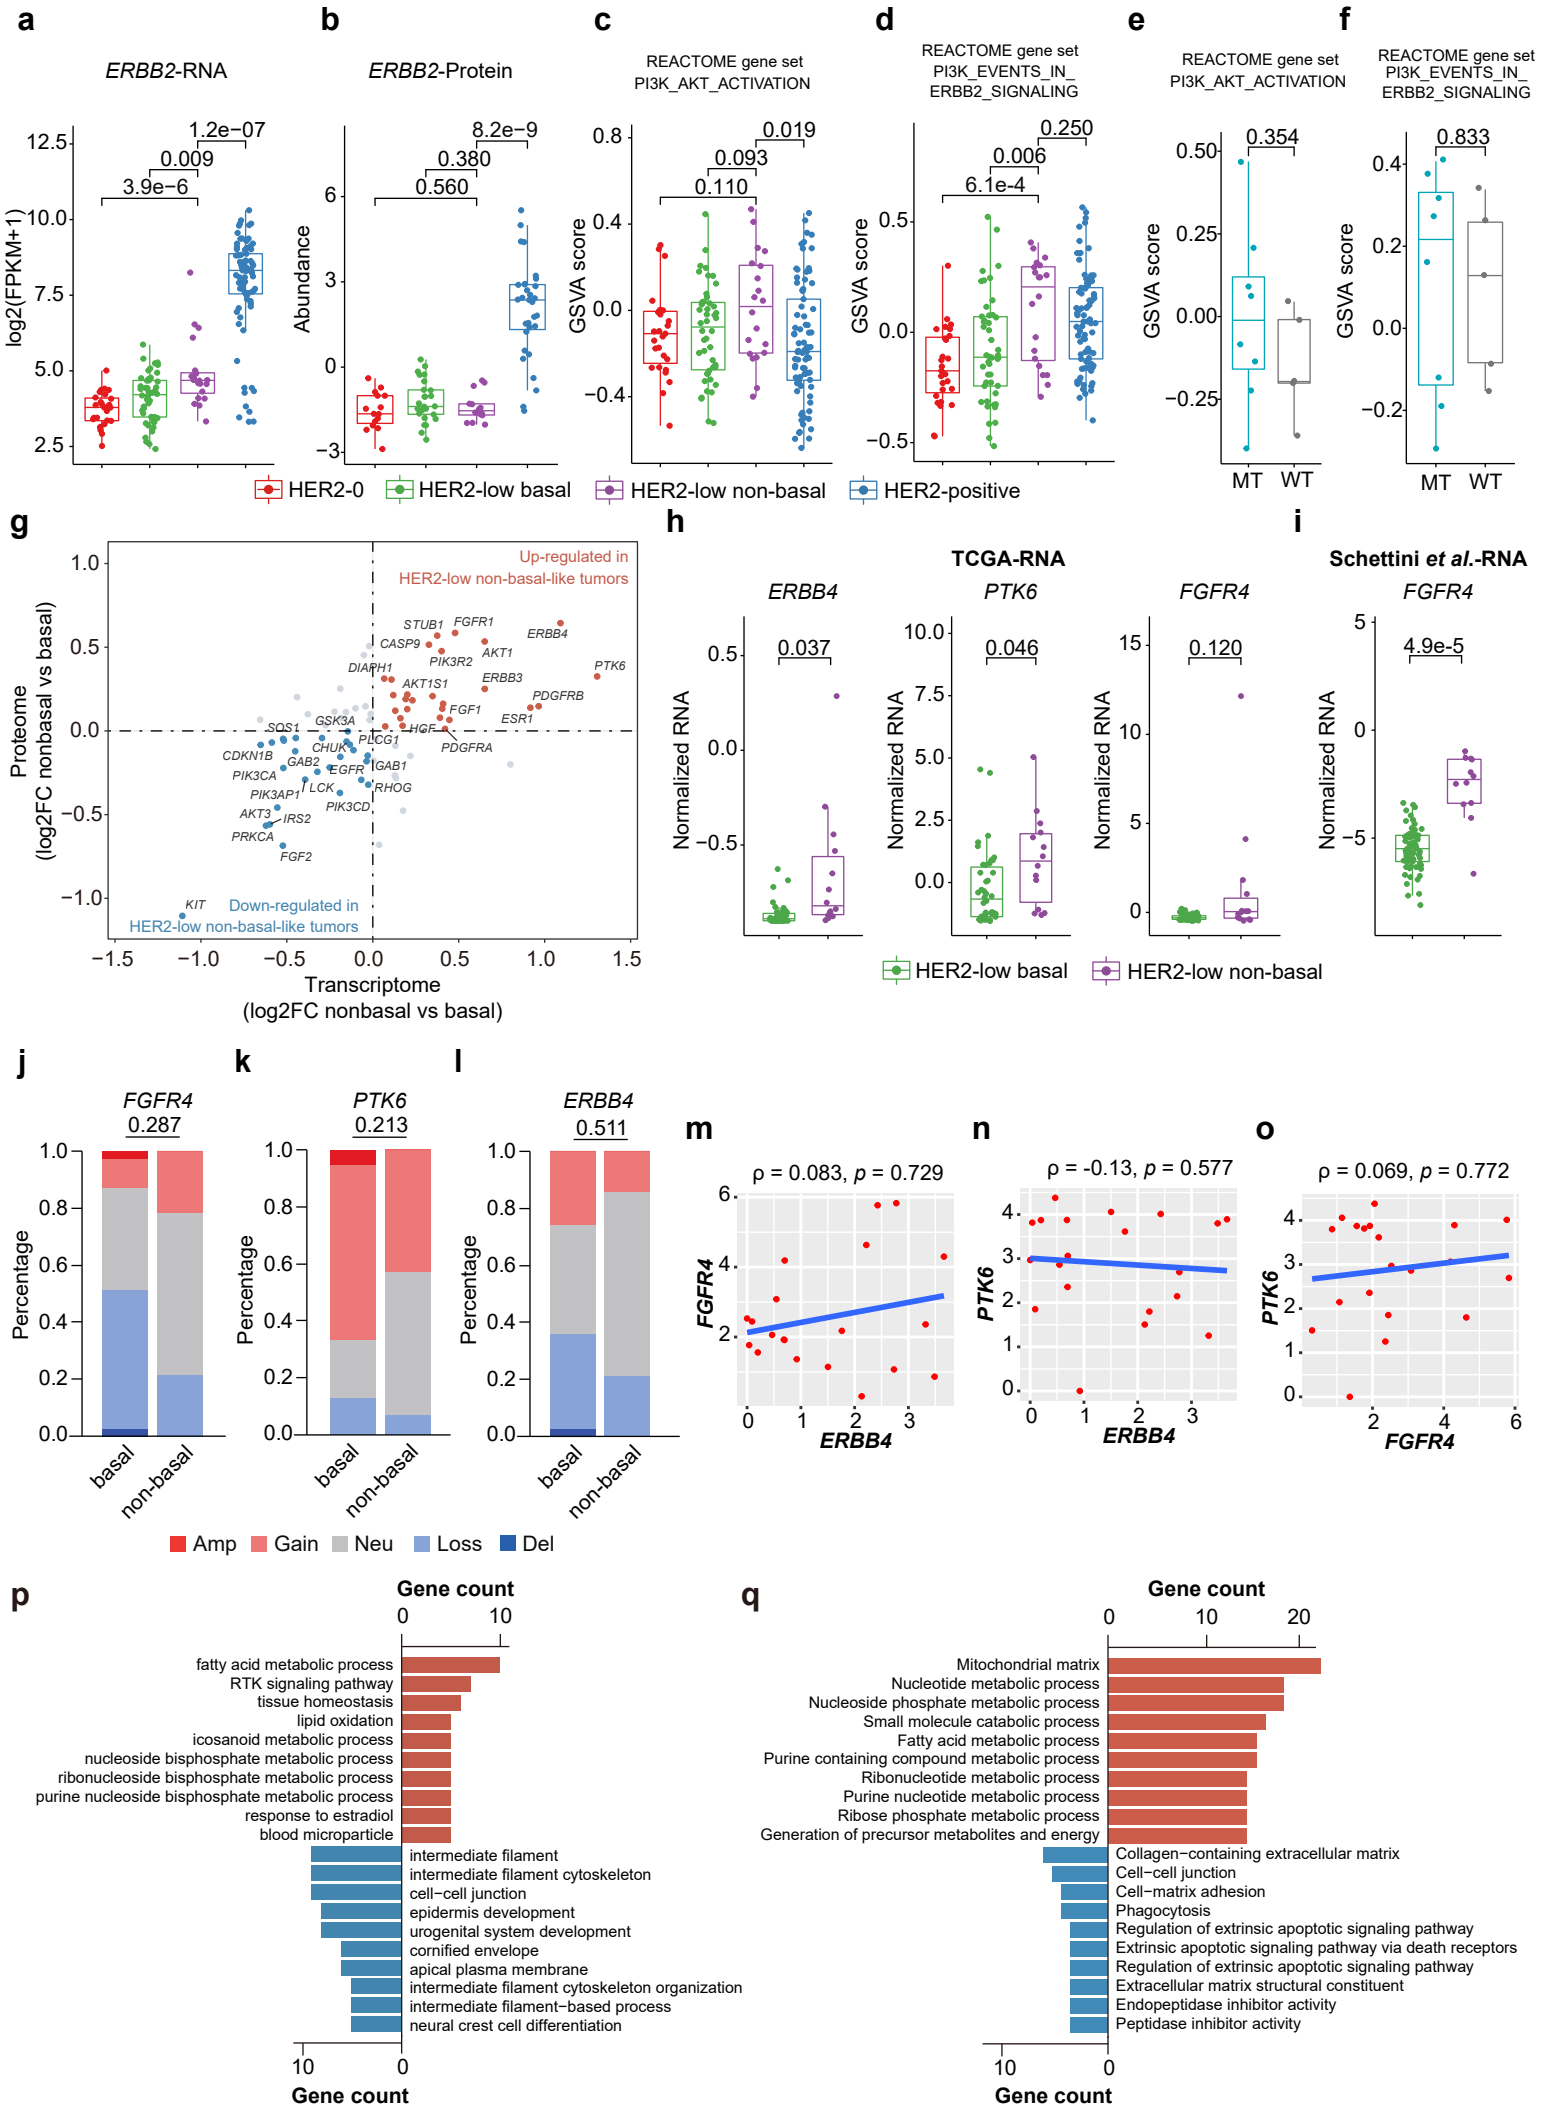



**Figure S8. Internal molecular heterogeneity of HR-negative HER2-low breast cancers, related to Figure 4.**

- (a-b) Boxplot comparing the mRNA (a) and protein (b) levels of *ERBB2* among HER2 subgroups. For RNA, the number (N) of HER2-0, HER2-low basal-like, HER2-low non-basal-like, and HER2-positive is 27, 46, 20 and 81. For protein, the number (N) was 15, 26, 14 and 31. P values were computed using the two-sided Wilcoxon test.
- (c-d) Boxplots comparing the enrichment score of *REACTOME PI3K AKT ACTIVATION* (c) or *PI3K EVENTS IN ERBB2 SIGNALING* (d) among HER2 subgroups using gene set variation analysis (GSVA). The number (N) of HER2-0, HER2-low basal-like, HER2-low non-basal-like, and HER2-positive is 27, 46, 20 and 81. P values were computed using the two-sided Wilcoxon test.
- (e-f) Boxplot comparing the enrichment score of *REACTOME PI3K AKT ACTIVATION* (e) and *PI3K EVENTS IN ERBB2 SIGNALING* (f) between *PIK3CA* wild-type (WT, N=5) and mutated samples (MT, N=8) among tumor subgroups. P values were computed using the two-sided Wilcoxon test.
- (g) Dot plot showing the log<sub>2</sub>(fold change) of the comparison of genes involved in PI3K and *ERBB2* signaling between HR-negative HER2-low non-basal-like tumors and basal-like tumors at both the RNA and protein levels.
- (h) Expression of *ERBB4*, *PTK6* and *FGFR4* among HER2 subgroups in the TCGA-BRCA cohort<sup>4,5</sup>. The number (N) of HER2-low basal-like and HER2-low non-basal-like is 42 and 14. P values were computed using the two-sided Wilcoxon test.
- (i) Expression of *FGFR4* among HER2 subgroups in Schettini *et al.*'s cohort<sup>6</sup>. The number (N) of HER2-low basal-like and HER2-low non-basal-like is 65 and 12. P values were computed using the two-sided Wilcoxon test.
- (j-l) Bar plots comparing the copy number alterations (CNAs) of *FGFR4* (j), *PTK6* (k) and *ERBB4* (l) between non-basal-like tumors and basal-like tumors. P values were computed using the two-sided Fisher's exact test.
- (m-o) Dot plot of the Spearman correlation between the expression of *ERBB4* and *FGFR4* (m), *ERBB4* and *PTK6* (n), and *PTK6* and *FGFR4* (o). P values were computed by Spearman correlation analysis.
- (p-q) Gene Ontology (GO) enrichment analysis of genes (p) and proteins (q) that were differentially expressed between HER2-low non-basal-like and basal-like tumors.

Basal: basal-like; non-basal: non-basal-like.

In boxplots, the centerline represents the median, the box limits represent the upper and lower quartiles, the whiskers represent the 1.5x interquartile range, and the points represent individual samples.

Source data are provided as a Source Data file.

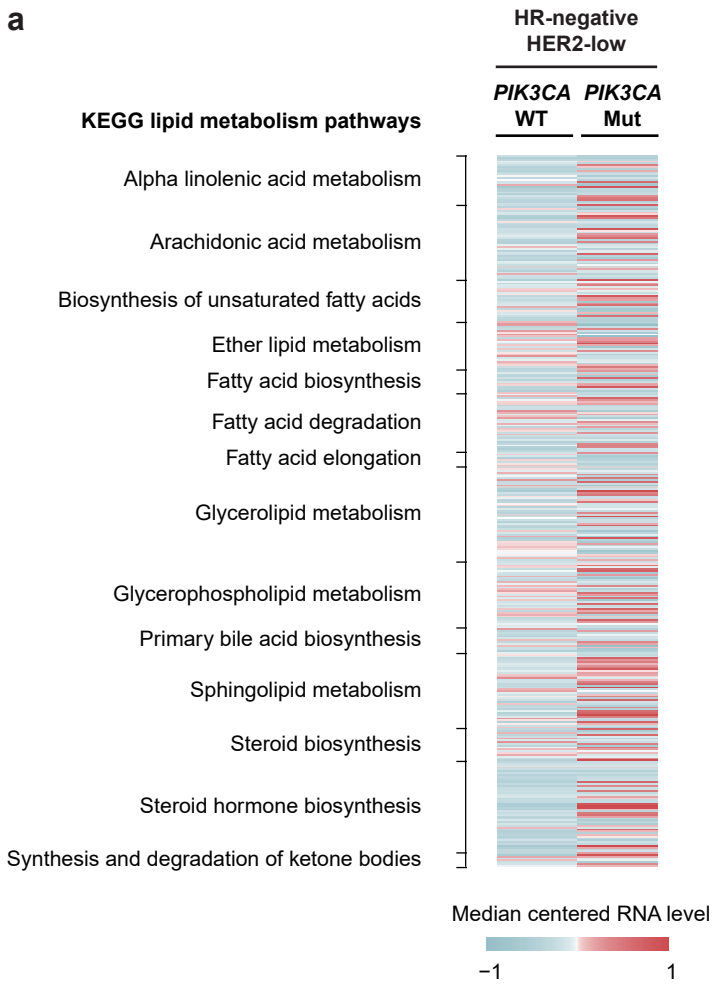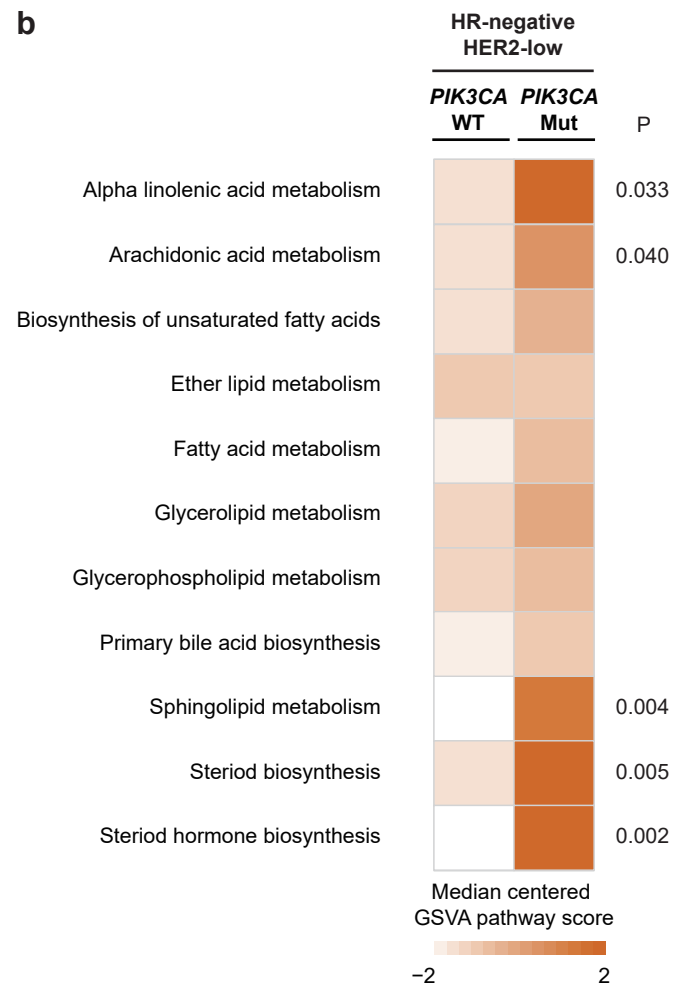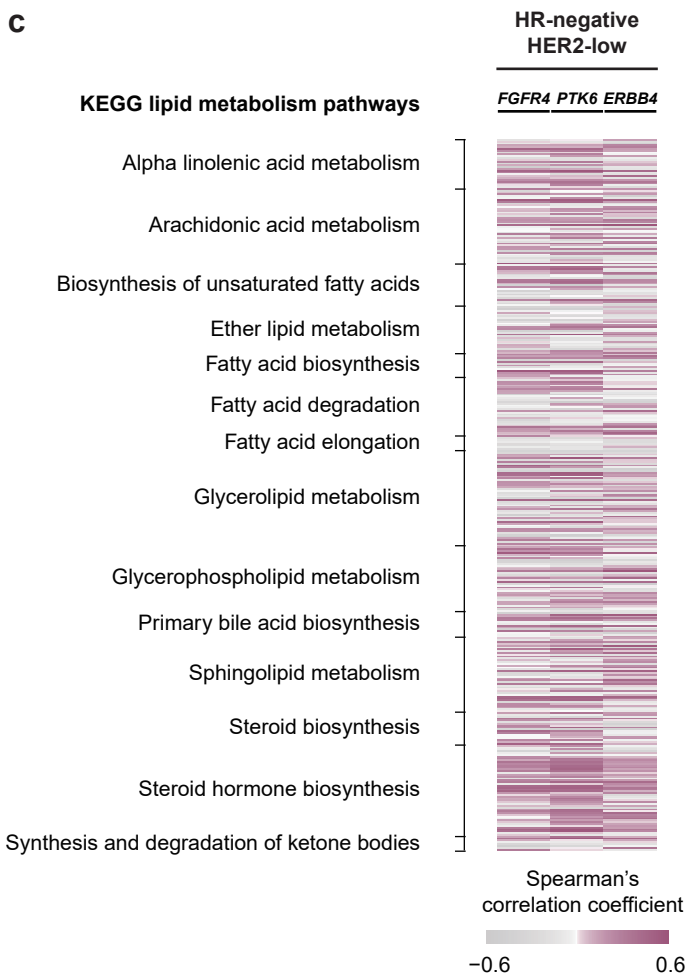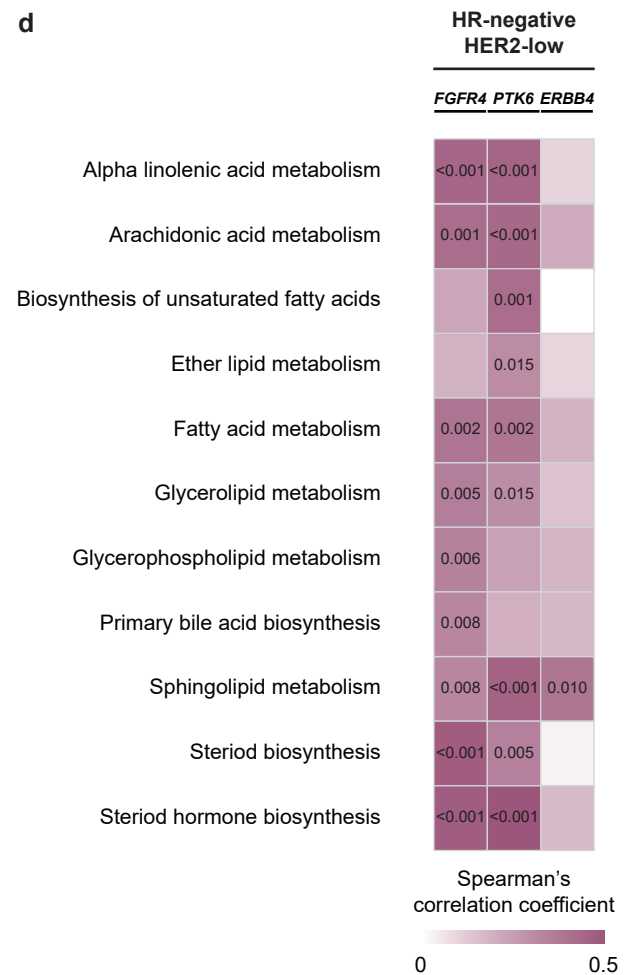

**Figure S9. The association between molecular characteristics and lipid metabolism in HR-negative HER2-low breast cancers, related to Figure 4.**

(a) Heatmap comparing the gene expression level of lipid metabolism between *PIK3CA*-mutated and *PIK3CA*-wild-type breast cancers.

(b) Heatmap comparing the pathway score of lipid metabolism between *PIK3CA*-mutated and *PIK3CA*-wild-type breast cancers. Original p values derived from two-sided Wilcoxon test that is less than 0.05 were annotated.

(c) Heatmap showing Spearman's correlation coefficient between the expression levels of *FGFR4/PTK6/ERBB4* and lipid metabolism-related genes.

(d) Heatmap showing Spearman's correlation coefficient between the expression levels of *FGFR4/PTK6/ERBB4* and the pathway scores of lipid metabolism. Pathways that were significantly correlated with *FGFR4/PTK6/ERBB4* levels (FDR from two-sided Spearman's correlation coefficient were less than 0.05) are marked with the exact FDR.

Source data are provided as a Source Data file.

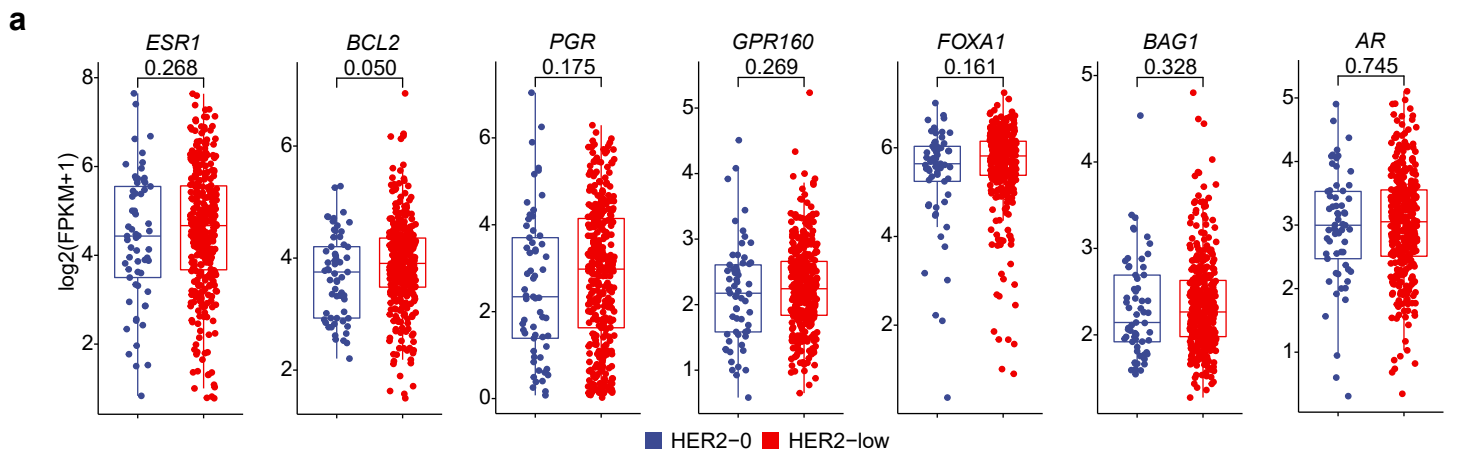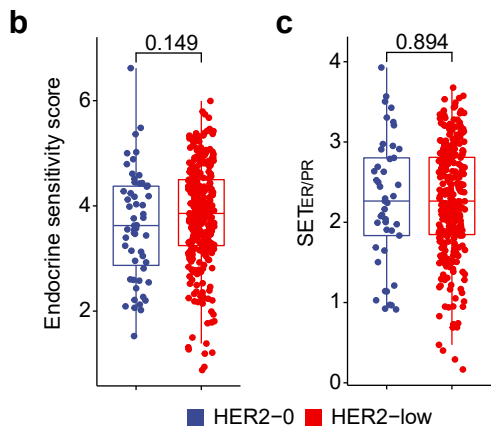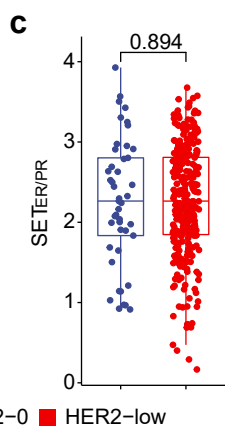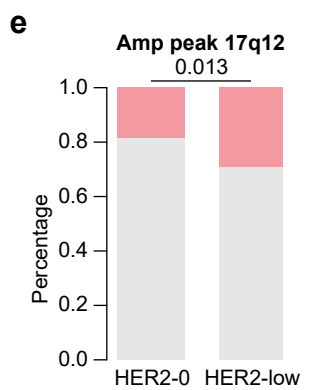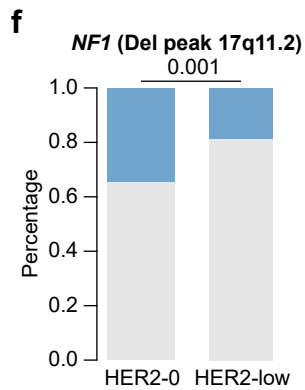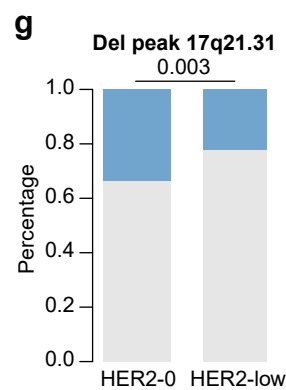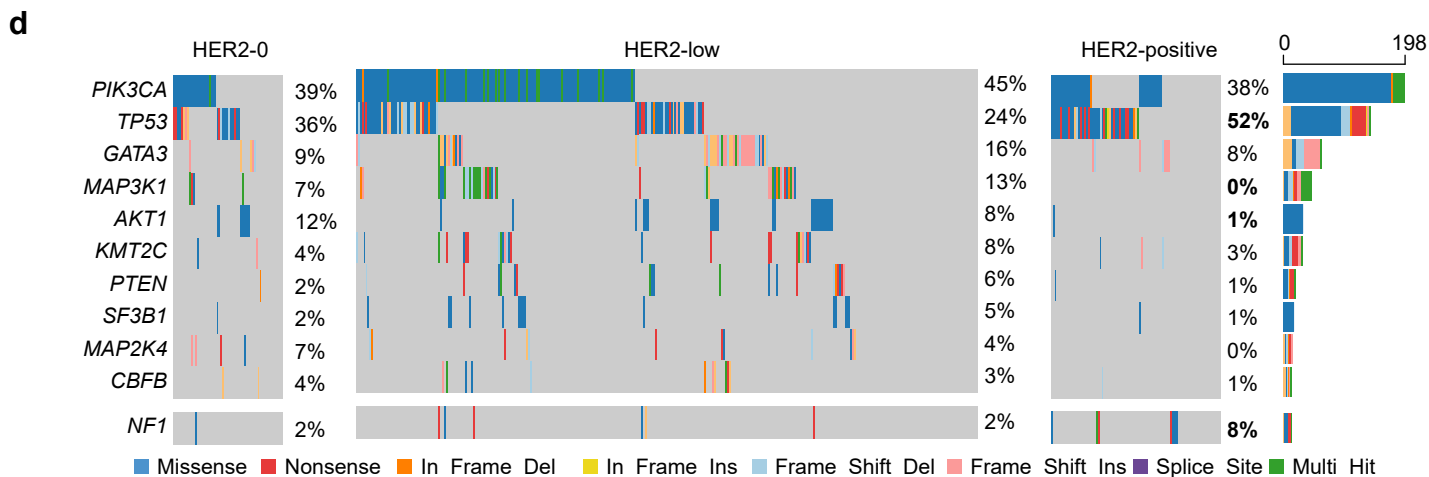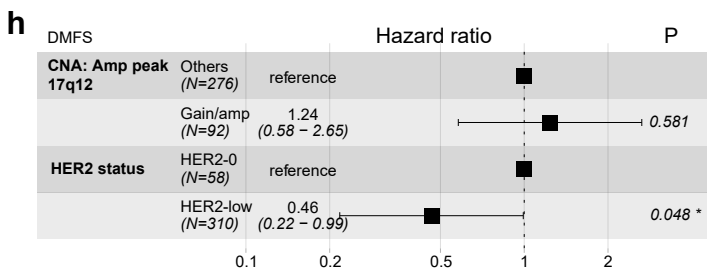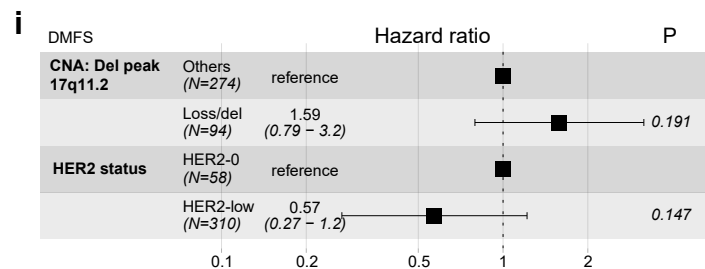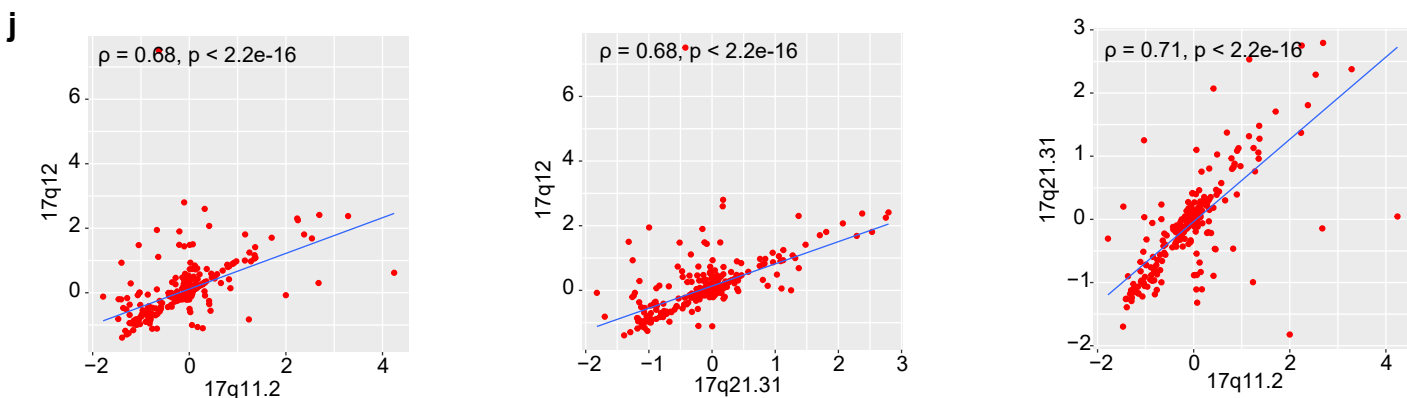

**Figure S10. Molecular difference between HER2-low and HER2-0 tumors in the HR-positive subgroup and its relation with survival, related to Figure 5.**

- (a-c) Boxplots comparing luminal-related genes<sup>6</sup> (b), endocrine sensitivity score<sup>7</sup> (c) and SET<sub>ER/PR</sub> score<sup>8</sup> (d). In boxplots, the centerline represents the median, the box limits represent the upper and lower quartiles, the whiskers represent the 1.5x interquartile range, and the points represent individual samples. For luminal-related genes, the number (N) of HER2-0 and HER2-low is 61 and 355. For endocrine sensitivity score, the number (N) was 55 and 301. For SET<sub>ER/PR</sub> score, the number (N) was 57 and 282. P values were computed using the two-sided Wilcoxon test.
- (d) Somatic mutations of cancer-related genes (CAGs) among HER2 status subgroups. Upper panel: top 10 frequently mutated CAGs, lower panel: other differentially mutated CAGs between HER2 status subgroups. Genes that were differentially mutated (P<0.05) between HER2-positive and HER2-0 tumors compared with HER2-low tumors are in bold font. P values were computed using the two-sided Fisher's exact test.
- (e-g) Comparison of the copy number of Amp peak 17q12 (e), Del peak 17q11.12 (f) and Del peak 17q21.31 (g). P values were computed using the two-sided Fisher's exact test.
- (h-i) Forest plots showing the multivariable Cox regression analysis for distant metastasis-free survival (DMFS) of the status HR and the status of focal peaks 17q12 (h) and 17q11.2 (i) in HR-positive HER2-low breast cancers. Number(N) of patients belonging to each category is indicated. Association of all variables with prognosis is analyzed using a two-sided Cox proportional hazard regression analysis. Error bars represent the 95% confidence interval of hazard ratio.
- (j) Spearman's correlation between the copy numbers of 17q11.2, 17q21.31 and 17q12. P values were computed by Spearman's rank correlation analysis.

Gain/amp: gain/amplification; Loss/del: loss/deletion.

Source data are provided as a Source Data file.

**a**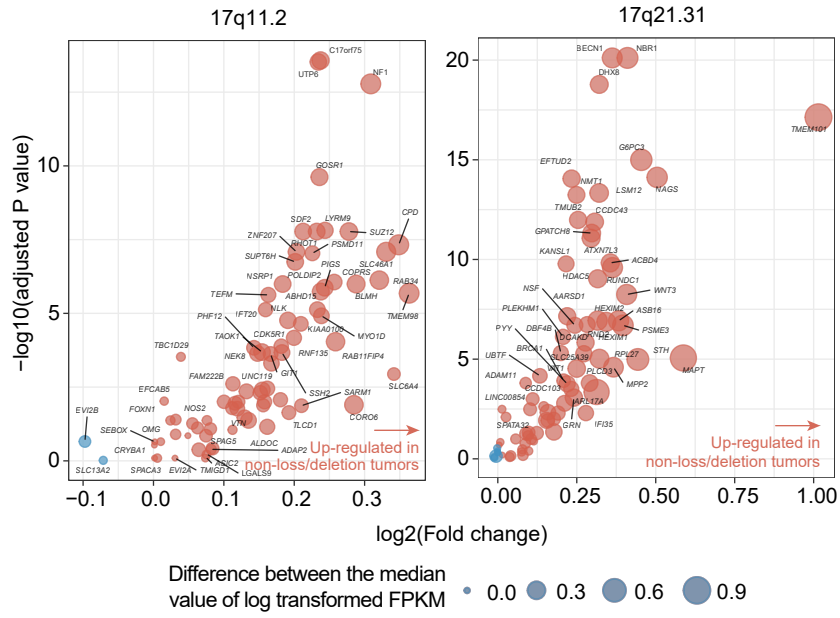**b**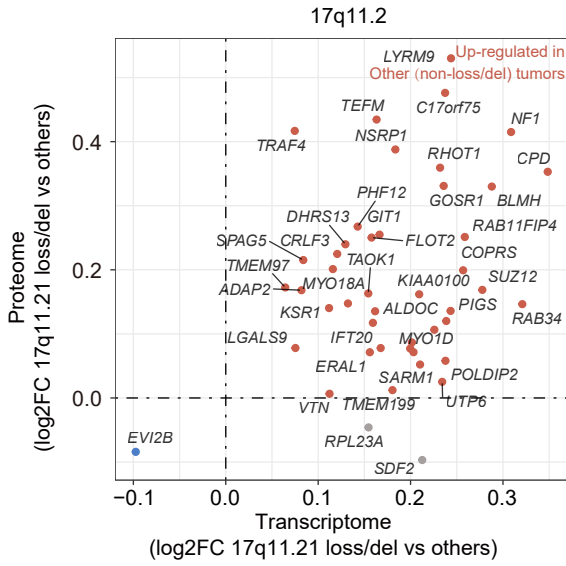**c**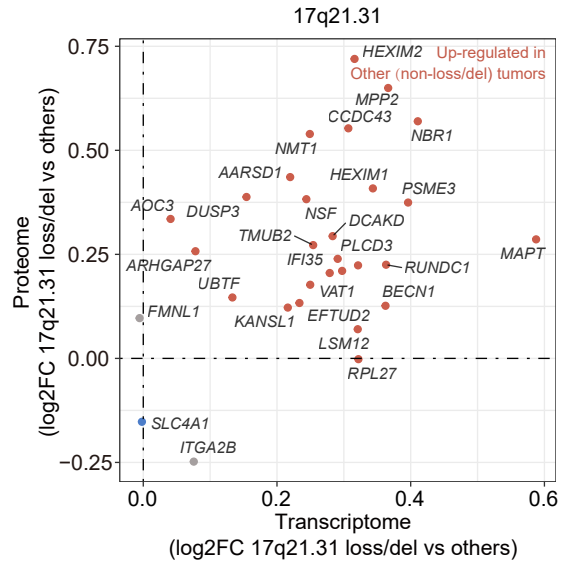

**Figure S11. Downstream effect of loss/deletion in 17q11.2 and 17q21.31 within the HR-positive HER2-negative subgroup, related to Figure 5.**

(a) Comparison of the expression level of genes located in 17q11.2 and 17q21.31 between loss/deletion patients and others. P values were computed using the two-sided Wilcoxon test and were adjusted for multiple testing using false discovery rate method.

(b-c) Dot plot showing the  $\log_2$ (fold change) of the comparison of genes located in 17q11.2 (b) and 17q21.31 (c) between tumors with or without loss/deletion in corresponding peaks at both the RNA and protein levels.

Source data are provided as a Source Data file.

**Table S1. Baseline characteristics of included patients stratified by HER2 status.**

|                                     |               | Overall<br>N=707 | HER2-0<br>N=91 | HER2-low<br>N=434 | HER2-positive<br>N=182 | <i>P</i> 1 | <i>P</i> 2 | <i>P</i> 3 |
|-------------------------------------|---------------|------------------|----------------|-------------------|------------------------|------------|------------|------------|
| Clinicopathological characteristics |               |                  |                |                   |                        |            |            |            |
| Age (years)                         | Mean (SD)     | 53.00 (10.40)    | 53.57 (11.95)  | 53.26 (10.49)     | 52.07 (9.30)           | 0.364      | 0.805      | 0.182      |
| Age (years, %)                      | <40           | 61 (8.6)         | 12 (13.2)      | 33 (7.6)          | 16 (8.8)               | 0.109      | 0.184      | 0.143      |
|                                     | 40-59         | 466 (65.9)       | 53 (58.2)      | 283 (65.2)        | 130 (71.4)             |            |            |            |
|                                     | ≥60           | 180 (25.5)       | 26 (28.6)      | 118 (27.2)        | 36 (19.8)              |            |            |            |
| Menopause (%)                       | Male          | 1 (0.1)          | 0 (0.0)        | 1 (0.2)           | 0 (0.0)                | 0.810      | 0.416      | 0.670      |
|                                     | No            | 289 (40.9)       | 33 (36.3)      | 184 (42.5)        | 72 (39.6)              |            |            |            |
|                                     | Yes           | 416 (58.9)       | 58 (63.7)      | 248 (57.3)        | 110 (60.4)             |            |            |            |
|                                     | NA            | 1                | 0              | 1                 | 0                      |            |            |            |
| Laterality (%)                      | Left          | 370 (52.3)       | 48 (52.7)      | 217 (50.0)        | 105 (57.7)             | 0.216      | 0.646      | 0.093      |
|                                     | Right         | 337 (47.7)       | 43 (47.3)      | 217 (50.0)        | 77 (42.3)              |            |            |            |
| HER2-low status full (%)            | HER2 0        | 91 (12.9)        | 91 (100.0)     | 0 (0.0)           | 0 (0.0)                | /          | /          | /          |
|                                     | HER2 1+       | 227 (32.1)       | 0 (0.0)        | 227 (52.3)        | 0 (0.0)                |            |            |            |
|                                     | HER2 2+ ISH-  | 207 (29.3)       | 0 (0.0)        | 207 (47.7)        | 0 (0.0)                |            |            |            |
|                                     | HER2 positive | 182 (25.7)       | 0 (0.0)        | 0 (0.0)           | 182 (100.0)            |            |            |            |
| Histology (%)                       | IDC           | 675 (95.5)       | 88 (96.7)      | 408 (94.0)        | 179 (98.4)             | 0.048      | 0.121      | 0.090      |
|                                     | ILC           | 18 (2.5)         | 0 (0.0)        | 16 (3.7)          | 2 (1.1)                |            |            |            |
|                                     | Other         | 14 (2.0)         | 3 (3.3)        | 10 (2.3)          | 1 (0.5)                |            |            |            |
| Grade (%)                           | <3            | 350 (52.2)       | 43 (48.9)      | 250 (61.7)        | 57 (32.0)              | 1.9e-10    | 0.031      | 3.4e-11    |
|                                     | 3             | 321 (47.8)       | 45 (51.1)      | 155 (38.3)        | 121 (68.0)             |            |            |            |
|                                     | NA            | 36               | 3              | 29                | 4                      |            |            |            |
| Ki67 percentage (%)                 | <20           | 142 (20.1)       | 20 (22.0)      | 112 (25.8)        | 10 (5.5)               | 2.4e-9     | 0.507      | 4.8e-10    |
|                                     | ≥20           | 565 (79.9)       | 71 (78.0)      | 322 (74.2)        | 172 (94.5)             |            |            |            |
| HR status (%)                       | Positive      | 525 (74.3)       | 63 (69.2)      | 361 (83.2)        | 101 (55.5)             | 7.8e-12    | 0.003      | 2.8e-12    |
|                                     | Negative      | 182 (25.7)       | 28 (30.8)      | 73 (16.8)         | 81 (44.5)              |            |            |            |
| sTILs                               | Mean (SD)     | 0.17 (0.15)      | 0.19 (0.16)    | 0.15 (0.14)       | 0.21 (0.15)            | 4.7e-5     | 0.052      | 9.6e-6     |
| iTILs                               | Mean (SD)     | 0.02 (0.02)      | 0.03 (0.03)    | 0.02 (0.02)       | 0.02 (0.03)            | 0.056      | 0.031      | 0.504      |
| pT (%)                              | pT1           | 310 (44.0)       | 37 (40.7)      | 201 (46.5)        | 72 (39.6)              | 0.627      | 0.563      | 0.246      |
|                                     | pT2           | 383 (54.3)       | 53 (58.2)      | 224 (51.9)        | 106 (58.2)             |            |            |            |
|                                     | pT3           | 12 (1.7)         | 1 (1.1)        | 7 (1.6)           | 4 (2.2)                |            |            |            |
|                                     | NA            | 2                | 0              | 2                 | 0                      |            |            |            |
| pN (%)                              | pN0           | 353 (51.6)       | 52 (61.2)      | 212 (50.8)        | 89 (48.9)              | 0.081      | 0.343      | 0.090      |
|                                     | pN1           | 188 (27.5)       | 21 (24.7)      | 120 (28.8)        | 47 (25.8)              |            |            |            |
|                                     | pN2           | 86 (12.6)        | 7 (8.2)        | 57 (13.7)         | 22 (12.1)              |            |            |            |
|                                     | pN3           | 57 (8.3)         | 5 (5.9)        | 28 (6.7)          | 24 (13.2)              |            |            |            |
|                                     | NA            | 23               | 6              | 17                | 0                      |            |            |            |
| Molecular features                  |               |                  |                |                   |                        |            |            |            |
| TMB (mutations/Mb)                  | Mean (SD)     | 1.45 (1.89)      | 1.47 (2.27)    | 1.33 (1.79)       | 1.71 (1.90)            | 0.114      | 0.553      | 0.032      |
| HRD score                           | Mean (SD)     | 24.36 (16.57)    | 28.54 (18.51)  | 22.81 (16.86)     | 26.41 (13.30)          | 0.015      | 0.014      | 0.057      |
| PAM50 (%)                           | LumA          | 202 (29.3)       | 25 (28.4)      | 159 (37.8)        | 18 (9.9)               | <2.2e-16   | 3.5e-4     | <2.2e-16   |
|                                     | LumB          | 200 (29.0)       | 24 (27.3)      | 141 (33.5)        | 35 (19.3)              |            |            |            |
|                                     | HER2          | 140 (20.3)       | 4 (4.5)        | 36 (8.6)          | 100 (55.2)             |            |            |            |
|                                     | Basal         | 105 (15.2)       | 31 (35.2)      | 58 (13.8)         | 16 (8.8)               |            |            |            |
|                                     | Normal        | 43 (6.2)         | 4 (4.5)        | 27 (6.4)          | 12 (6.6)               |            |            |            |
|                                     | NA            | 17               | 3              | 13                | 1                      |            |            |            |



Not available (NA) values in categorical variables were shown but not included in the statistical analysis. Statistical tests of continuous variables were performed using the two-sided Kruskal–Wallis rank sum test. Statistical tests of categorical variables were performed using the two-sided Fisher's exact test. *P1*: comparison among HER2-0, HER2-low and HER2-positive. *P2*: comparison between HER2-0 and HER2-low. *P3*: comparison between HER2-low and HER2-positive. IDC: invasive ductal carcinoma; ILC: invasive lobular carcinoma; ISH: *in situ* hybridization; HR: hormone receptor; sTILs: stromal tumor infiltrating lymphocytes; iTILs: intratumoral tumor infiltrating lymphocytes; TMB: tumor mutation burden; HRD: homologous recombination deficiency; LumA: luminal A; LumB: luminal B; HER2 (in PAM50 section): HER2-enriched; Basal: basal-like; Normal: normal-like; SD: standard deviation.

**Table S2. Molecular features and treatment information of HER2-low and HER2-0 breast cancers stratified by hormone receptor (HR) status**

|                                |           | HR-positive   |               |          | HR-negative   |               |          |
|--------------------------------|-----------|---------------|---------------|----------|---------------|---------------|----------|
|                                |           | HER2-0        | HER2-low      | <i>P</i> | HER2-0        | HER2-low      | <i>P</i> |
|                                |           | N=63          | N=361         |          | N=28          | N=73          |          |
| Molecular features             |           |               |               |          |               |               |          |
| TMB (mutations/Mb)             | Mean (SD) | 0.93 (0.92)   | 1.16 (1.73)   | 0.327    | 2.86 (3.73)   | 2.33 (1.85)   | 0.398    |
| HRD score                      | Mean (SD) | 20.47 (15.39) | 19.31 (14.33) | 0.623    | 45.05 (12.48) | 40.98 (17.47) | 0.329    |
| PAM50 (%)                      | LumA      | 25 (41.0)     | 157 (44.2)    | 0.534    | 0 (0.0)       | 2 (3.0)       | 0.015    |
|                                | LumB      | 23 (37.7)     | 140 (39.4)    |          | 1 (3.7)       | 1 (1.5)       |          |
|                                | HER2      | 4 (6.6)       | 22 (6.2)      |          | 0 (0.0)       | 14 (21.2)     |          |
|                                | Basal     | 5 (8.2)       | 12 (3.4)      |          | 26 (96.3)     | 46 (69.7)     |          |
|                                | Normal    | 4 (6.6)       | 24 (6.8)      |          | 0 (0.0)       | 3 (4.5)       |          |
|                                | NA        | 2             | 6             |          | 1             | 7             |          |
| Treatment information          |           |               |               |          |               |               |          |
| Adjuvant chemotherapy (%)      | No        | 9 (14.8)      | 76 (22.6)     | 0.234    | 1 (3.6)       | 2 (2.9)       | 1        |
|                                | Yes       | 52 (85.2)     | 261 (77.4)    |          | 27 (96.4)     | 66 (97.1)     |          |
|                                | NA        | 2             | 24            |          | 0             | 5             |          |
| Taxane usage (%)               | No        | 15 (30.0)     | 108 (34.0)    | 0.632    | 3 (15.8)      | 16 (23.2)     | 0.753    |
|                                | Yes       | 35 (70.0)     | 210 (66.0)    |          | 16 (84.2)     | 53 (76.8)     |          |
|                                | NA        | 13            | 43            |          | 9             | 4             |          |
| Anthracycline usage (%)        | No        | 24 (48.0)     | 144 (45.3)    | 0.761    | 7 (36.8)      | 15 (21.7)     | 0.232    |
|                                | Yes       | 26 (52.0)     | 174 (54.7)    |          | 12 (63.2)     | 54 (78.3)     |          |
|                                | NA        | 13            | 43            |          | 9             | 4             |          |
| Platinum usage (%)             | No        | 50 (100.0)    | 318 (100.0)   | /        | 16 (84.2)     | 63 (91.3)     | 0.399    |
|                                | Yes       | 0 (0.0)       | 0 (0.0)       |          | 3 (15.8)      | 6 (8.7)       |          |
|                                | NA        | 13            | 43            |          | 9             | 4             |          |
| Capecitabine usage (%)         | No        | 49 (98.0)     | 316 (99.4)    | 0.356    | 17 (89.5)     | 63 (91.3)     | 1        |
|                                | Yes       | 1 (2.0)       | 2 (0.6)       |          | 2 (10.5)      | 6 (8.7)       |          |
|                                | NA        | 13            | 43            |          | 9             | 4             |          |
| Adjuvant radiotherapy (%)      | No        | 42 (67.7)     | 208 (65.4)    | 0.771    | 22 (78.6)     | 56 (77.8)     | 1        |
|                                | Yes       | 20 (32.3)     | 110 (34.6)    |          | 6 (21.4)      | 16 (22.2)     |          |
|                                | NA        | 1             | 43            |          | 0             | 1             |          |
| Adjuvant endocrine therapy (%) | No        | 2 (3.4)       | 5 (1.6)       | 0.311    | 28 (100.0)    | 72 (98.6)     | 1        |
|                                | Yes       | 57 (96.6)     | 305 (98.4)    |          | 0 (0.0)       | 1 (1.4)       |          |
|                                | NA        | 4             | 51            |          | 0             | 0             |          |

Not available (NA) values in categorical variables were shown but not included in the statistical analysis. Statistical tests of continuous variables were performed using the Kruskal–Wallis rank sum test. Statistical tests of categorical variables were performed using Fisher's exact test or the chi-square test, where appropriate. HR: hormone receptor; TMB: tumor mutation burden; HRD: homologous recombination deficiency; LumA: luminal A; LumB: luminal B; HER2 (in PAM50 section): HER2-enriched; basal: basal-like; normal: normal-like; SD: standard deviation.

## Supplementary Methods

### Sample processing for genomic DNA and total RNA extraction

Fresh frozen tumor tissues were macrodissected to prevent the influence of stromal tissues (<30% stromal tissue). The percentage of tumor cells was confirmed to be 50% or more in all breast cancer specimens. We purified genomic DNA from fresh frozen samples and peripheral blood cells using TGuide M24 (Tiangen, Beijing, China). The purity and quantity of genomic DNA were estimated by measuring the absorbance at 260 nm (A260) and 280 nm (A280) using a NanoDrop 2000 spectrophotometer (Thermo Scientific, Wilmington, DE, USA). The extracted DNA was considered pure and suitable for future experiments when the A260/A280 ratio was within the range of 1.6-1.9. We purified the total RNA from tissues that had been previously stored in RNAlater solution using the miRNeasy Mini Kit (Qiagen #217004) according to the manufacturer's instructions. RNA integrity was assessed by an Agilent 4200 Bioanalyzer using RNA ScreenTape (Agilent Inc.), and concentrations were determined by a NanoDrop ND-8000 spectrophotometer (Thermo Fisher Scientific Inc.).

### RNA sequencing

#### Sample preparation and data generation

Libraries were constructed by ribosomal RNA depletion methods. Ribosomal RNA was depleted using a Ribo-off rRNA Depletion Kit (H/M/R) (Vazyme #N406, Vazyme Biotech Co., Ltd., Nanjing, China), and RNA libraries were constructed using a VAHTS Universal V8 RNA-seq Library Prep Kit for Illumina (Vazyme #NR605, Vazyme Biotech Co., Ltd., Nanjing, China). Specifically, the fragmented RNAs were reverse-transcribed into cDNA, and then 3-terminal poly(A) modification was completed. Subsequently, adapters were added to the cDNA. PCR was then used to amplify the libraries. During quality control (QC) of the libraries, Qubit 4.0 (Thermo Fisher Scientific Inc.) and Agilent 2200 Bioanalyzer (Agilent Inc.) were used to detect the concentration and fragment size distribution of the libraries, respectively. The libraries were sequenced on Illumina NovaSeq platforms with paired-end reads of 150 bp.

The raw Illumina sequence data were demultiplexed and converted to FASTQ files, and adapter and low-quality sequences were quantified. Sample reads were then mapped to the hg38 human genome reference using HISAT2. We obtained the fragments per kilobase of transcript per million mapped reads (FPKM) using StringTie and Ballgown. To choose genes with accurate expression values, we removed genes whose FPKM was 0 in more than 30% of the samples before subsequent analyses.

### Whole-exome sequencing

#### Sample preparation and data generation

Qualified genomic DNA from tissues and matched white blood cell samples was prepared for whole-exome sequencing (WES). A total of 300 ng of each DNA sample based on Qubit quantification was fragmented on a Bioruptor Plus sonication system (Diagenode, Liège, Belgium). Sheared DNA was used to perform end repair, A-tailing and adapter ligation with an Agilent SureSelectXT Library Prep Kit (Agilent Technologies, Santa Clara, CA, USA) according to the manufacturer's protocol. Then, 750 ng of prepared DNA in a volume of 3.4 ml was captured using Agilent SureSelect Human All Exon V6 (Agilent Technologies) probes, followed by the amplification of the captured library with indexing primers. Quality control was performed using the Agilent 2100 Bioanalyzer (Agilent Technologies) with a DNA chip. After quantified with a Qubit® 3.0 fluorometer (Invitrogen, Carlsbad, CA, USA), the libraries were sequenced on an Illumina HiSeq platform (Illumina Inc., San Diego, CA, USA). For each library preparation from tissue, 12 samples were loaded in a single lane. For each library preparation from blood, 20 samples were loaded in a single lane.

#### Genomic data analysis

The exome-sequenced reads were aligned using BWA-mem, and the resulting BAM files were preprocessed with duplicate marking and base quality score recalibration using version 202010.02 of Sentieon Genomics tools<sup>9</sup>. Sequencing quality was assessed using NGSCheckMate<sup>10</sup>, FastQ Screen<sup>11</sup>, FastQC<sup>12</sup> and Qualimap<sup>13</sup>.

#### Somatic variant calling

VarScan2 v2.4.2<sup>14</sup> (--min-coverage 3 --min-coverage-normal 3 --min-coverage-tumor 3 --min-var-freq 0.08 --p-value 0.10 --somatic-p-value 0.05 --strand-filter 1), TNseq<sup>9</sup>, and TNscope<sup>15</sup> (sentieon driver -t -r --algo TNscope --dbsnp --pon) were used to identify the somatic mutations. Specifically, for the raw VarScan2 results, processSomatic and somaticFilter (--min-coverage 10 --min-reads 2 2 2 --min-strands 2 1 --min-avg-qual 20 --p-value 0.1) were used to extract high-confidence somatic mutations and to remove clusters of false positives and SNV calls near indels. TNseq detected and filtered out variants by TNhaplotyper2 (--germline\_vcf --pon --algo OrientationBias and --algo ContaminationModel) and TNfilter (--contamination --tumor\_segments --orientation\_priors). Both TNseq and TNscope adopted a panel of

normal (PoN) samples to screen out expected germline variation and artifacts. This PoN panel was based on 699 normal blood samples, from which two VCF files were created for the sites identified as mutations by TNseq and TNscope. In addition, the location of the population germline resource containing the population allele frequencies obtained from gnomAD<sup>16</sup> was used to filter the raw TNseq results.

To obtain the final set of variant calls, we used a two-step approach, first removing any spurious variant calls arising as a consequence of sequencing artifacts and then making use of consensus mutations in at least two out of three callers to identify somatic mutations. Second, additional filtering based on bam-readcount (<https://github.com/genome/bam-readcount>) was performed to reduce false-positive calls: 1) variant allele frequency (VAF)  $\geq 5\%$ ; 2) sequencing depth in the region  $\geq 8$ ; and 3) sequence reads in support of the variant call  $\geq 4$ . A catalog of cancer driver genes was assembled with: (1) the curated cancer gene list by OncoKB (October 2020)<sup>17</sup>; (2) previously published and functionally validated oncogenic driver genes by Bailey, et al<sup>18</sup>; (3) the compendium of mutational cancer driver genes from the Integrative OncoGenomics<sup>19</sup>; (4) genes recorded as oncogene or tumor suppressor gene (TSG) by the Cancer Gene Census<sup>20</sup>.

## **Copy number alterations**

### ***Sample preparation and data generation***

The OncoScan CNV Assay Kit (Affymetrix, Santa Clara, CA, USA) was used to perform genome-wide copy number analysis according to the manufacturer's recommendations. Briefly, a total of 80 ng of DNA from each tumor sample was processed. Molecular inversion probes (MIPs) were mixed with the sample DNA and annealed at 58°C overnight. The annealed DNA was divided into two equal parts and incubated with AT or GC gap-fill master mixes for ligation. Then, exonuclease treatment was performed to remove the unincorporated, noncircularized MIPs and the remaining genomic template. The circularized MIPs were linearized with a cleavage enzyme, and the two PCR amplifications were performed successively. The amplified products were digested with HaeIII and Exo enzymes, and the small fragments containing the specific single-nucleotide polymorphism (SNP) genotype were hybridized onto arrays. The arrays were washed and stained using a GeneChip Fluidics Station 450 (Affymetrix, Santa Clara, CA, USA) and scanned using a GeneChip Scanner 3000 7G (Affymetrix, Santa Clara, CA, USA). The fluorescence of clusters was measured to generate a DAT file. Cluster intensity values were automatically calculated using a built-in algorithm from DAT files using GeneChip Command Console software (Affymetrix, Santa Clara, CA, USA), and a CEL file was generated.

### ***Analysis of SNP array data***

An analysis of Affymetrix OncoScan CNV SNP probe assays was performed with Chromosome Analysis Suite (ChAS) v4.1 software (Thermo Fisher Scientific). A copy number reference model file was built by using a reference cohort of DNA from 23 randomly selected white blood cell samples from the mentioned patients and positive control samples from the OncoScan CNV Assay Kit. Probe-level output from the ChAS was analyzed using ASCAT (v2.4.3)<sup>21</sup> to obtain segmented copy number calls, estimated tumor ploidy and estimated tumor purity results. The ASCAT segments were subsequently used to produce log<sub>2</sub> ratios by dividing by the total copy number (nAraw + nBraw, with zero values set to 0.05). These segments were used as the input of GISTIC2.0 (v2.0.22)<sup>22</sup> to study the recurrence of gene-level CNVs in our sample set. GISTIC2.0 was run with the following parameters changed from the default settings (-ta 0.2 -td 0.2 -genegistic 1 -smallmem 1 -broad 1 -conf 0.95 -rx 0 -brlen 0.7 -cap 3.5 -armpeel 1 -js 100). Moreover, a group of adjacent normal tissues from 23 patients was used to filter recurrent germline/potential false-positive calls. Based on their segment output, the probes that suggested gain or loss in at least five patients were used with the help of Integrative Genomics Viewer to constitute a CNV file for removing recurrent germline/potential false-positive calls in GISTIC2.0.

## **MS sample processing and data collection for proteomics**

### ***Proteome analysis***

Proteins were extracted and denatured from 1-2 mg of fresh frozen tissues in 30  $\mu$ L lysis buffer (6 M urea, 2 M thiourea, 100 mM triethylammonium bicarbonate), followed by proteolytic digestion using Lys-C (Hualishi, Beijing, China) and trypsin (Hualishi, Beijing, China) assisted by pressure-cycling technology (PCT), as described previously<sup>23,24</sup>. TMTpro 16plex label reagents (Thermo Fisher Scientific, San Jose, USA) were used to label the digested peptides. A common pooled peptide sample was used as the reference control sample for each TMT batch. The TMT-labeled samples were cleaned with a C18 column (Waters Sep-Pak® Vac 1 cc C18 Cartridge) and fractionated using a Dionex UltiMate3000 HPLC system (Thermo Fisher Scientific, San Jose, USA) as described previously (Gao et al., 2020). Peptides were separated into 60 fractions, which were then consolidated into 30 fractions. The redissolved peptides were analyzed by liquid chromatography–tandem mass spectrometry (LC–MS/MS) with a nanoflow DIONEX UltiMate 3000 RSLCnano System (Thermo Scientific™, San Jose, USA) coupled with an Orbitrap Exploris 480 mass spectrometer (Thermo Scientific™, San Jose, USA), which was equipped with a FAIMS Pro™ (Thermo Scientific™, San Jose, USA) in data-

dependent acquisition (DDA) mode. The peptide samples were analyzed using an LC gradient of 60 min. The other LC–MS parameters followed a previous publication (Gao et al., 2020).

### **Database search**

The mass spectrometric (MS) data were analyzed by Proteome Discoverer (Version 2.4.1.15, Thermo Fisher) using the human protein database downloaded from UniProt (version 15/07/2020, 20368). Two trypsin missed cleavages were allowed. The minimal peptide length was set to 6 residues. Normalization was performed against the total peptide amount. Carbamidomethylation (+57.021 Da) of cysteine was set as static modification, while oxidation (+15.995 Da) of methionine and acetylation (+42.011 Da) of peptides' N-termini were set as variable modifications. Lysine residues and peptide N-termini were tagged with TMTpro (+304.207 Da). Precursor ion mass tolerance was set to 10 ppm, and fragment mass tolerance was to 0.02 Da. Both unique peptides and razor peptides were used for mapping the best associated master proteins. The master protein abundances were calculated by summation of their associated peptide groups. The false discovery rate (FDR) of peptide was set to 1% (strict) and 5% (relaxed). The other parameters followed the default setup. More details have been described previously <sup>25</sup>.

### **Normalization and quality control of proteomic data**

In the primary matrix of proteome data, columns were tested samples and rows were detected proteins. Samples with outlier median intensity ratio [defined as  $>\text{mean}(\text{intensity ratio})+2*\text{sd}(\text{intensity ratio})$  or  $<\text{mean}(\text{intensity ratio})-2*\text{sd}(\text{intensity ratio})$ ] were excluded by tumor samples and para-tumor samples respectively. Then, the matrix was first log<sub>2</sub>-transformed and then normalized by column-median. Batch effects were removed by the `removeBatchEffect` function in the R package `limma` <sup>26</sup>. Batch effects before and after batch effect removal were evaluated by principal component analysis (PCA). Proteins that were absent in over 30% of all samples were not included in further quality control analysis. Then samples were filtered by PCA, where sample out of the 90% confidence ellipses in PCA analysis (plotted with PC1 and PC2 using all included proteins) by tumor samples and para-tumor samples respectively. Finally, duplicated samples and genes were merge by using mean value.

## **MS sample processing and data collection for metabolomics**

### **Polar metabolomics detection**

#### **1) Sample quenching and extraction**

Twenty-five milligrams of sample was weighed into an EP tube, and 500  $\mu\text{L}$  of extraction solution (methanol:acetonitrile:water = 2:2:1) was added. Then, the samples were homogenized at 35 Hz for 4 min and sonicated for 5 min in an ice-water bath. The homogenization and sonication cycle was repeated 3 times. The samples were incubated for 1 h at  $-40^{\circ}\text{C}$  and centrifuged at 12000 rpm for 15 min at  $4^{\circ}\text{C}$  <sup>27</sup>. The QC sample was prepared by mixing equal aliquots of the supernatants from all of the samples.

#### **2) Chromatography separation**

LC–MS/MS analyses were performed using an ultrahigh-performance liquid chromatography (UHPLC) system (Vanquish, Thermo Fisher Scientific) with a UPLC BEH Amide column (2.1 mm  $\times$  100 mm, 1.7  $\mu\text{m}$ ) coupled to a Q Exactive High Field (QE-HFX) mass spectrometer (Orbitrap MS, Thermo). The mobile phase consisted of 25 mmol/L ammonium acetate and 25 mmol/L ammonia hydroxide in water (pH = 9.75) (A) and acetonitrile (B). The autosampler temperature was  $4^{\circ}\text{C}$ , and the injection volume was 2  $\mu\text{L}$ .

#### **3) Mass spectrometry**

A QE HFX mass spectrometer was used for its ability to acquire MS and MS/MS spectra in information-dependent acquisition (IDA) mode in the control of the acquisition software (Xcalibur, Thermo). In this mode, the acquisition software continuously evaluates the full-scan MS spectrum. The electrospray ionization (ESI) source conditions were set as follows: sheath gas flow rate of 30 Arb, Aux gas flow rate of 25 Arb, capillary temperature of  $350^{\circ}\text{C}$ , full MS resolution of 60000, MS/MS resolution of 7500, collision energy of 10/30/60 in normalized collision energy (NCE) mode, and spray voltage of 3.6 kV (positive) or -3.2 kV (negative).

#### **4) Data processing, metabolite identification and data analysis**

MS raw data files were converted to mzXML format by ProteoWizard software (version 3.0.19282) and processed by the R package XCMS (v3.2) for metabolomics. The data pretreatments include peak identification, peak alignment, peak extraction, retention time correction and peak integration. To make the metabolomics data reproducible, peaks with RSDs larger than 30% in the QC samples were filtered out. The remaining peaks were annotated by comparison to retention time and mass to charge ratio ( $m/z$ ) indices in the library by using the R package CAMERA <sup>28</sup>. After that, we

obtained a data matrix consisting of the retention time, m/z and peak intensities. The data matrix was further processed by removing the peaks with missing values (intensity = 0) in more than 50% of the samples. For each metabolite, the missing values were replaced with 50% of the lowest observed value of all detected samples<sup>29,30</sup>. The area of each peak was then normalized by isotopically labeled ISs for polar metabolomics<sup>31</sup>. To remove the unwanted intra- and interbatch analytical variations, each metabolite peak in all subject samples was normalized using the locally estimated scatterplot smoothing (LOESS) method based on QC samples<sup>31</sup>. In brief, a LOESS regression model was built based on the intensity drift of each metabolite in the QC samples and used to predict and correct the intensities of the same metabolite in subject samples<sup>31</sup>. In all, 11708 MS features were included for further annotation.

Then the MS/MS spectra were searched in an in-house database for polar metabolite annotation based on accurate mass (m/z,  $\pm 5$  ppm), retention time and spectral patterns. The MS/MS spectra matching score was calculated using dot-product algorithm, which take the fragments and intensities into consideration<sup>32</sup>. Metabolites with MS/MS matching score higher than 0.3 were included in our study. In all, 669 MS/MS features were annotated and included in our study.

In summary, only the peaks with MS/MS name and with MS/MS matching score higher than 0.3 were included for further analysis.

## **Lipidomic detection**

### **1) Sample quenching and extraction**

Twenty milligrams of sample was weighed into an EP tube. Two hundred microliters of water and 480  $\mu$ L of extract solution (MTBE: MeOH= 5: 1) were added sequentially. After 30 s of vortexing, the samples were homogenized at 35 Hz for 4 min and sonicated for 5 min in an ice-water bath. The homogenization and sonication cycle was repeated 3 times. Then, the samples were incubated at  $-40^{\circ}\text{C}$  for 1 h and centrifuged at 3000 rpm (RCF=900 ( $\times$ g), R= 8.6 cm) for 15 min at  $4^{\circ}\text{C}$ . Three hundred microliters of supernatant was transferred to a fresh tube, and the QC sample was prepared by mixing equal aliquots of the supernatants from all of the samples and drying the mixture in a vacuum concentrator at  $37^{\circ}\text{C}$ . Then, the dried samples were reconstituted in 150  $\mu$ L of 50% methanol in dichloromethane by sonication for 10 min in an ice-water bath. The constitution was then centrifuged at 13000 rpm (RCF=16200 ( $\times$ g), R= 8.6 cm) for 15 min at  $4^{\circ}\text{C}$ , and 120  $\mu$ L of supernatant was transferred to a fresh glass vial for LC/MS analysis.

### **2) Chromatography separation**

For lipidomics data collection, LC–MS/MS analyses were performed using a UHPLC system (1290, Agilent Technologies) equipped with a Kinetex C18 column (2.1 \* 100 mm, 1.7  $\mu$ m, Phenomen). Mobile phase A consisted of 40% water, 60% acetonitrile, and 10 mmol/L ammonium formate. Mobile phase B consisted of 10% acetonitrile and 90% isopropanol, to which 50 mL of 10 mmol/L ammonium formate was added for every 1000 mL of mixed solvent. The analysis was carried out with an elution gradient as follows: 0~12.0 min, 40%~100% B; 12.0~13.5 min, 100% B; 13.5~13.7 min, 100%~40% B; and 13.7~18.0 min, 40% B. The column temperature was  $55^{\circ}\text{C}$ . The autosampler temperature was  $4^{\circ}\text{C}$ , and the injection volume was 3  $\mu$ L (pos) or 3  $\mu$ L (neg).

### **3) Mass spectrometry**

A QE mass spectrometer was used for its ability to acquire MS and MS/MS spectra in DDA mode in the control of the acquisition software (Xcalibur 4.0.27, Thermo). In this mode, the acquisition software continuously evaluates the full-scan MS spectrum. The ESI source conditions were set as follows: sheath gas flow rate of 30 Arb, Aux gas flow rate of 10 Arb, capillary temperature of  $320^{\circ}\text{C}$  (positive) and  $300^{\circ}\text{C}$  (negative), full MS resolution of 70000, MS/MS resolution of 17500, collision energy of 15/30/45 in NCE mode, and spray voltage of 5 kV (positive) or -4.5 kV (negative).

### **4) Data processing, metabolite identification and data analysis**

MS raw data files were converted to mzXML format by ProteoWizard software (version 3.0.19282) and processed by LipidAnalyzer for lipidomics data. The data pretreatments include peak identification, peak alignment, peak extraction, retention time correction and peak integration. The filtering of reliable lipid peaks and the normalization of data were similar to that in polar metabolomics. Then, the LipidBlast database was applied for lipid annotation. The MS/MS spectra matching score was also calculated as described in the polar metabolomic analysis section. Generally, 1312 MS/MS peaks were identified for lipidomics.

In summary, only the peaks with MS/MS name and with MS/MS matching score higher than 0.3 were included for further analysis.

## References

- 1 Lehmann, B. D. *et al.* Identification of human triple-negative breast cancer subtypes and preclinical models for selection of targeted therapies. *The Journal of clinical investigation* **121**, 2750-2767, doi:10.1172/jci45014 (2011).
- 2 Burstein, M. D. *et al.* Comprehensive genomic analysis identifies novel subtypes and targets of triple-negative breast cancer. *Clinical cancer research : an official journal of the American Association for Cancer Research* **21**, 1688-1698, doi:10.1158/1078-0432.Ccr-14-0432 (2015).
- 3 Quist, J. *et al.* A Four-gene Decision Tree Signature Classification of Triple-negative Breast Cancer: Implications for Targeted Therapeutics. *Mol Cancer Ther* **18**, 204-212, doi:10.1158/1535-7163.MCT-18-0243 (2019).
- 4 Agostinetto, E. *et al.* HER2-Low Breast Cancer: Molecular Characteristics and Prognosis. *Cancers* **13**, 2824 (2021).
- 5 Comprehensive molecular portraits of human breast tumours. *Nature* **490**, 61-70, doi:10.1038/nature11412 (2012).
- 6 Schettini, F. *et al.* Clinical, pathological, and PAM50 gene expression features of HER2-low breast cancer. *npj Breast Cancer* **7**, 1-13 (2021).
- 7 Liu, X. Y. *et al.* Genomic Landscape and Endocrine-Resistant Subgroup in Estrogen Receptor-Positive, Progesterone Receptor-Negative, and HER2-Negative Breast Cancer. *Theranostics* **8**, 6386-6399, doi:10.7150/thno.29164 (2018).
- 8 Sinn, B. V. *et al.* SET(ER/PR): a robust 18-gene predictor for sensitivity to endocrine therapy for metastatic breast cancer. *NPJ Breast Cancer* **5**, 16, doi:10.1038/s41523-019-0111-0 (2019).
- 9 Freed, D., Aldana, R., Weber, J. A. & Edwards, J. S. The Sentieon Genomics Tools-A fast and accurate solution to variant calling from next-generation sequence data. *BioRxiv*, 115717 (2017).
- 10 Lee, S. *et al.* NGSCheckMate: software for validating sample identity in next-generation sequencing studies within and across data types. *Nucleic Acids Res.* **45**, e103-e103 (2017).
- 11 Wingett, S. W. & Andrews, S. FastQ Screen: A tool for multi-genome mapping and quality control. *F1000Res* **7**, 1338, doi:10.12688/f1000research.15931.2 (2018).
- 12 Andrews, S. FASTQC: A Quality Control Tool for High Throughput Sequence Data. <http://www.bioinformatics.babraham.ac.uk/projects/> (2014).
- 13 Okonechnikov, K., Conesa, A. & García-Alcalde, F. Qualimap 2: advanced multi-sample quality control for high-throughput sequencing data. *Bioinformatics* **32**, 292-294, doi:10.1093/bioinformatics/btv566 (2016).
- 14 Koboldt, D. C. *et al.* VarScan 2: somatic mutation and copy number alteration discovery in cancer by exome sequencing. *Genome research* **22**, 568-576 (2012).
- 15 Freed, D., Pan, R. & Aldana, R. TNscope: accurate detection of somatic mutations with haplotype-based variant candidate detection and machine learning filtering. *bioRxiv*, 250647 (2018).
- 16 Karczewski, K. & Francioli, L. The genome aggregation database (gnomAD). *MacArthur Lab* (2017).
- 17 Chakravarty, D. *et al.* OncoKB: A Precision Oncology Knowledge Base. *JCO Precis Oncol* **2017**, doi:10.1200/PO.17.00011 (2017).
- 18 Bailey, M. H. *et al.* Comprehensive Characterization of Cancer Driver Genes and Mutations. *Cell* **174**, 1034-1035, doi:10.1016/j.cell.2018.07.034 (2018).
- 19 Martinez-Jimenez, F. *et al.* A compendium of mutational cancer driver genes. *Nat Rev Cancer* **20**, 555-572, doi:10.1038/s41568-020-0290-x (2020).
- 20 Futreal, P. A. *et al.* A census of human cancer genes. *Nat Rev Cancer* **4**, 177-183, doi:10.1038/nrc1299 (2004).
- 21 Van Loo, P. *et al.* Allele-specific copy number analysis of tumors. *Proceedings of the National Academy of Sciences of the United States of America* **107**, 16910-16915, doi:10.1073/pnas.1009843107 (2010).
- 22 Mermel, C. H. *et al.* GISTIC2.0 facilitates sensitive and confident localization of the targets of focal somatic copy-number alteration in human cancers. *Genome biology* **12**, R41, doi:10.1186/gb-2011-12-4-r41 (2011).
- 23 Guo, T. *et al.* Rapid mass spectrometric conversion of tissue biopsy samples into permanent quantitative digital proteome maps. *Nature medicine* **21**, 407-413, doi:10.1038/nm.3807 (2015).

- 24 Zhu, Y. *et al.* High-throughput proteomic analysis of FFPE tissue samples facilitates tumor stratification. *Mol Oncol* **13**, 2305-2328, doi:10.1002/1878-0261.12570 (2019).
- 25 Shen, B. *et al.* Proteomic and Metabolomic Characterization of COVID-19 Patient Sera. *Cell* **182**, 59-72 e15, doi:10.1016/j.cell.2020.05.032 (2020).
- 26 Ritchie, M. E. *et al.* limma powers differential expression analyses for RNA-sequencing and microarray studies. *Nucleic acids research* **43**, e47, doi:10.1093/nar/gkv007 (2015).
- 27 Yang, C. *et al.* Effect of vitamin D3 on immunity and antioxidant capacity of pearl oyster *Pinctada fucata martensii* after transplantation: Insights from LC-MS-based metabolomics analysis. *Fish Shellfish Immunol.* **94**, 271-279, doi:10.1016/j.fsi.2019.09.017 (2019).
- 28 XueKe, G. *et al.* Lipidomics and RNA-Seq Study of Lipid Regulation in *Aphis gossypii* parasitized by *Lysiphlebia japonica*. *Sci. Rep.* **7**, 1364, doi:10.1038/s41598-017-01546-1 (2017).
- 29 Wei, R. *et al.* Missing Value Imputation Approach for Mass Spectrometry-based Metabolomics Data. *Sci Rep* **8**, 663, doi:10.1038/s41598-017-19120-0 (2018).
- 30 Tiedt, S. *et al.* Circulating Metabolites Differentiate Acute Ischemic Stroke from Stroke Mimics. *Ann Neurol* **88**, 736-746, doi:10.1002/ana.25859 (2020).
- 31 Dunn, W. B. *et al.* Procedures for large-scale metabolic profiling of serum and plasma using gas chromatography and liquid chromatography coupled to mass spectrometry. *Nat. Protoc.* **6**, 1060-1083, doi:10.1038/nprot.2011.335 (2011).
- 32 Stein, S. E. & Scott, D. R. Optimization and testing of mass spectral library search algorithms for compound identification. *J Am Soc Mass Spectrom* **5**, 859-866, doi:10.1016/1044-0305(94)87009-8 (1994).
